# Supplementary material for: A specific G9a inhibitor unveils BGLT3 lncRNA as a universal mediator of chemically induced fetal globin gene expression
Source: PubMed Central journal article supplement (PMC9837035; doi:10.1038/s41467-022-35404-0), 2023-01-12
Supplement: 41467_2022_35404_MOESM1_ESM.pdf [file 41467_2022_35404_MOESM1_ESM.pdf]

# **A specific G9a inhibitor unveils BGLT3 lncRNA as a universal mediator of chemically induced fetal globin gene expression**

Shohei Takase, Takashi Hiroyama, Fumiyuki Shirai, Yuki Maemoto, Akiko Nakata, Mayumi Arata, Seiji Matsuoka, Takeshi Sonoda, Hideaki Niwa, Shin Sato, Takashi Umehara, Mikako Shirouzu, Yosuke Nishigaya, Tatsunobu Sumiya, Noriaki Hashimoto, Ryosuke Namie, Masaya Usui, Tomokazu Ohishi, Shun-ichi Ohba, Manabu Kawada, Yoshihiro Hayashi, Hironori Harada, Tokio Yamaguchi, Yoichi Shinkai, Yukio Nakamura, Minoru Yoshida\*, Akihiro Ito\*

\*Corresponding authors: yoshidam@riken.jp (M.Y.), aito@toyaku.ac.jp (A.I.)

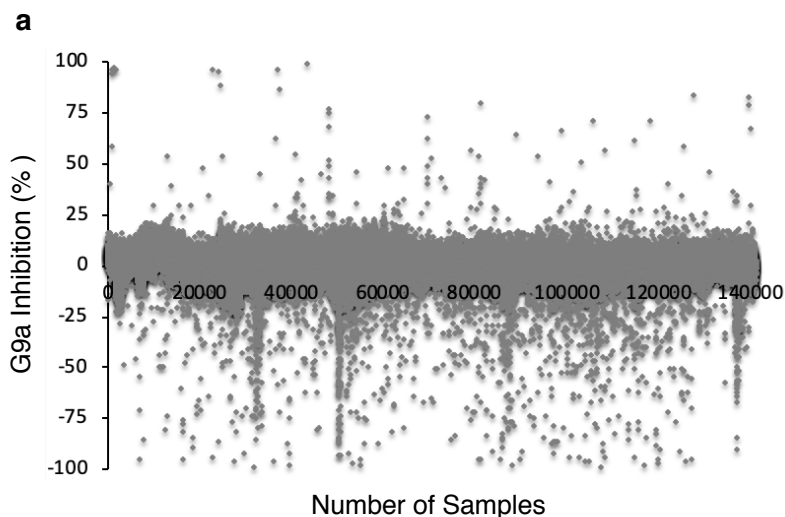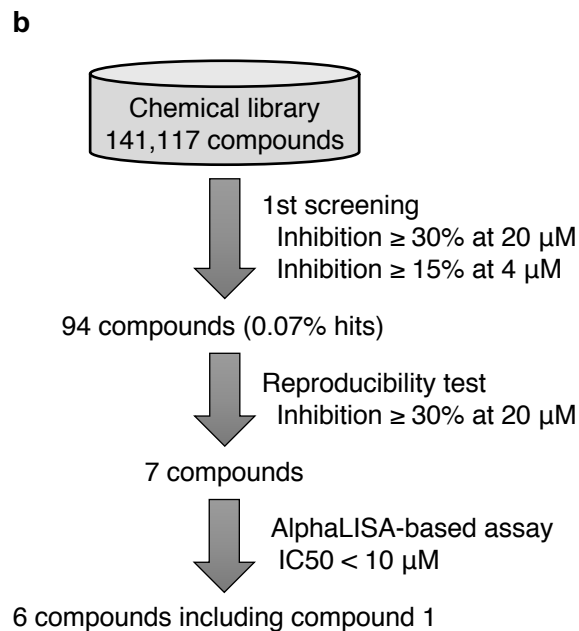

**Supplementary Fig. 1. High-throughput screening for discovery of G9a inhibitors.**

(a) Scatter plot of primary screening results. (b) Screening flowchart to identify compound 1. Of 141,117 compounds from the DDI tested in HTS using an *in vitro* fluorogenic assay, 94 initial hit compounds were found at a hit rate of 0.07%. After testing reproducibility and calculation of IC<sub>50</sub> values by the AlphaLISA-based assay, 6 compounds were identified as final hit compounds including compound 1.

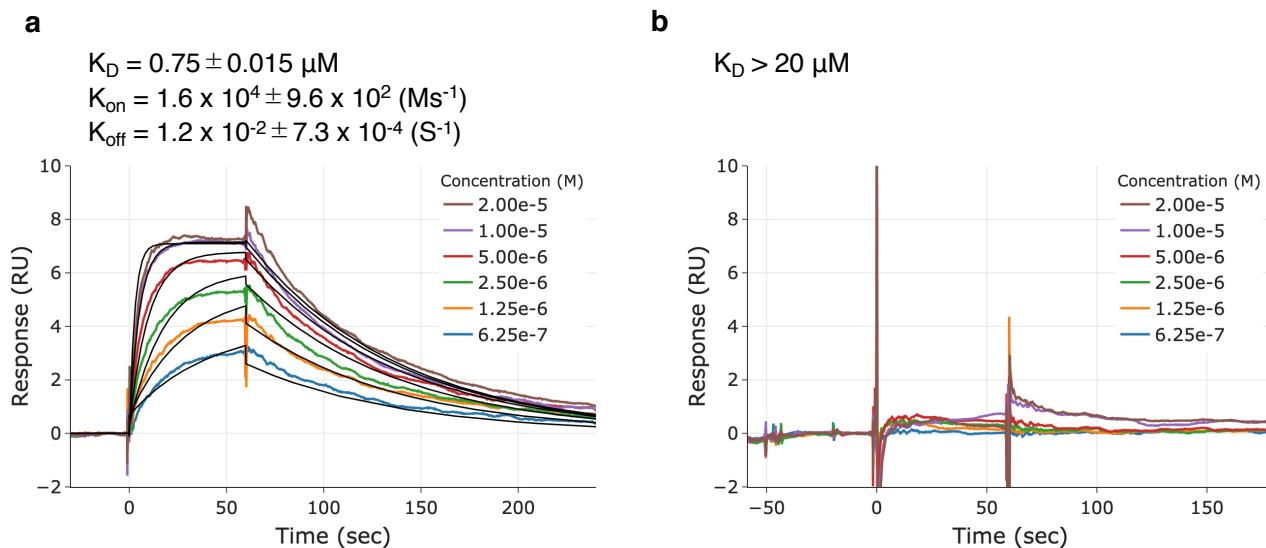

**Supplementary Fig. 2. Surface plasmon resonance (SPR) analysis of binding of RK-701 and RK-0133114 to G9a.**

**(a)** Kinetics analysis of RK-701 binding. Dissociation constant ( $K_D$ ), association rate constant ( $K_{on}$ ), and dissociation rate constant ( $K_{off}$ ) shown in the figure are the mean  $\pm$  SD of three kinetics runs. The sensorgram is representative from three independent runs. **(b)** SPR sensorgram of RK-0133114.

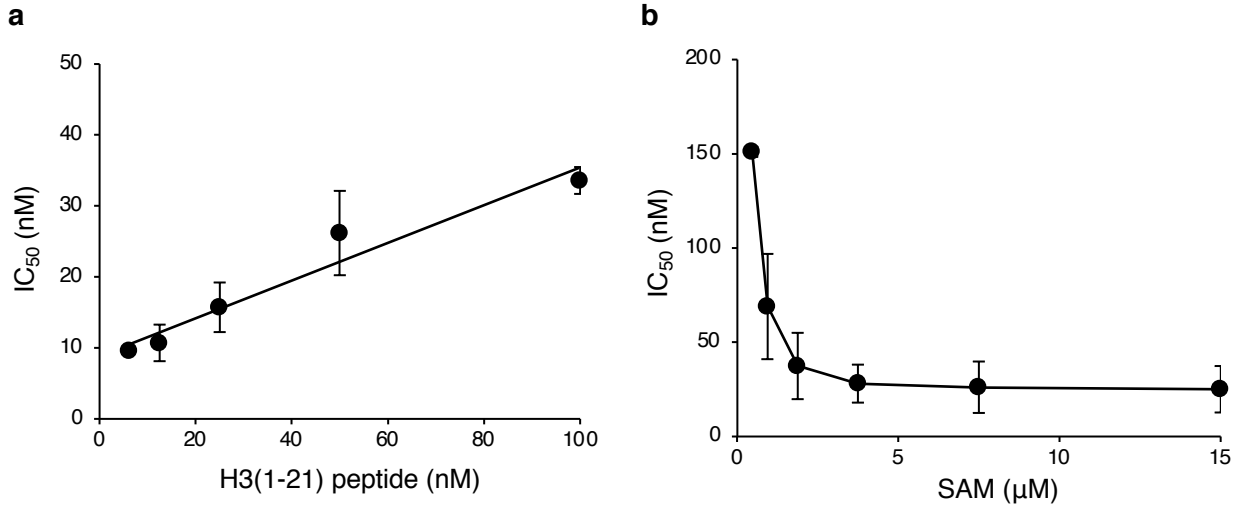

**Supplementary Fig. 3. Mechanism of G9a inhibition by RK-701.**

(a and b) IC<sub>50</sub> vs biotinylated histone H3-derived peptide plot (a) and IC<sub>50</sub> vs SAM plot (b) were analyzed by the AlphaLISA. Data are mean  $\pm$  SD from three independent experiments.

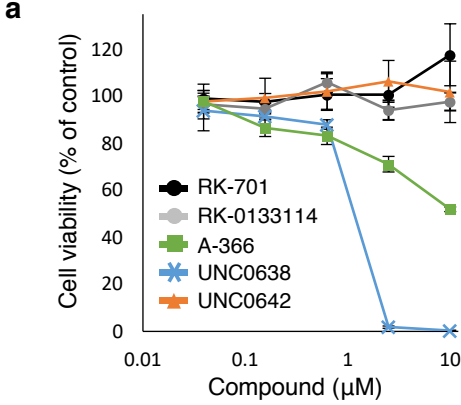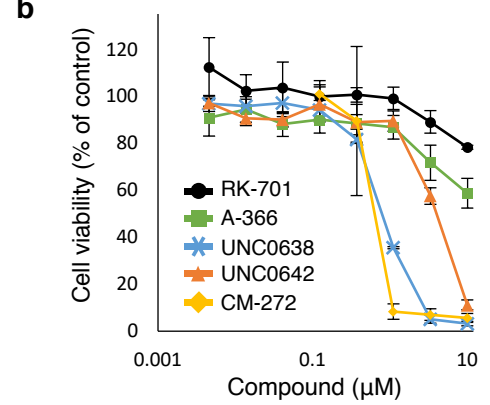

**c**

| Dose (mg/kg) | RK-701 | UNC0638 | A366 | UNC0642 |
|--------------|--------|---------|------|---------|
| 100          | 3/3    | N.D.    | N.D. | N.D.    |
| 50           | 3/3    | N.D.    | N.D. | N.D.    |
| 25           | 3/3    | 0/3     | N.D. | 0/3     |
| 12.5         | 3/3    | 0/3     | N.D. | 1/3     |
| 6.25         | N.D.   | 0/3     | N.D. | 2/3     |
| 3.125        | N.D.   | 3/3     | 0/3  | 3/3     |
| 1.5625       | N.D.   | 3/3     | 0/3  | 3/3     |
| 0.78125      | N.D.   | N.D.    | 3/3  | N.D.    |
| 0.390625     | N.D.   | N.D.    | 3/3  | N.D.    |
| 0.1953125    | N.D.   | N.D.    | 3/3  | N.D.    |

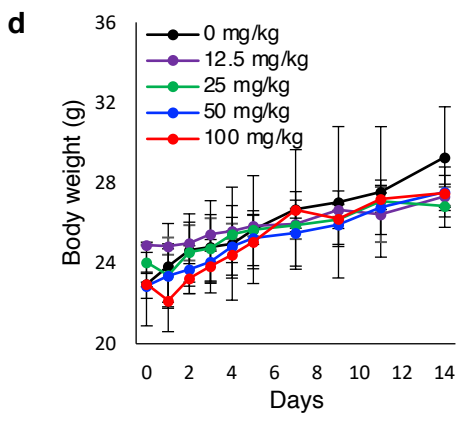

**e**

| Compound | Concentration ( $\mu\text{g}/\text{plate}$ ) | Number of revertants/plate               |      |                             |      |
|----------|----------------------------------------------|------------------------------------------|------|-----------------------------|------|
|          |                                              | Base pair substitution mutation<br>TA100 |      | Frameshift mutation<br>TA98 |      |
|          |                                              | + S9                                     | - S9 | + S9                        | - S9 |
| RK-701   | 0                                            | 121                                      | 125  | 36                          | 19   |
|          | 4.88                                         | 113                                      | 123  | 28                          | 17   |
|          | 19.5                                         | 119                                      | 105  | 29                          | 13   |
|          | 78.1                                         | 123                                      | 98   | 31                          | 17   |
|          | 313                                          | 112                                      | 118  | 28                          | 13   |
|          | 1250*                                        | 110                                      | 97   | 30                          | 12   |
|          | 2500*                                        | 104                                      | 103  | 28                          | 12   |
|          | 5000*                                        | 111                                      | 96   | 26                          | 15   |
| AF-2     | 0.01                                         | -                                        | 727  | -                           | -    |
|          | 0.1                                          | -                                        | -    | -                           | 502  |
| B[a]P    | 5.0                                          | 1375                                     | -    | 288                         | -    |

**f**

| Dose (mg/kg) | N   | Number of MNPCE in 4000 PCE |             | MNPCE (%)       | No. of PCE in 500 erythrocytes |                | PCE (%) |
|--------------|-----|-----------------------------|-------------|-----------------|--------------------------------|----------------|---------|
|              |     | Mean $\pm$ S.D.             | Min. / Max. |                 | Mean $\pm$ S.D.                | Min. / Max.    |         |
| RK-701       | 0   | 5                           | 5           | 5               | 5                              | 5              | 5       |
|              |     | Mean $\pm$ S.D.             | 6 $\pm$ 1   | 0.14 $\pm$ 0.04 | 320 $\pm$ 13                   | 64.0 $\pm$ 2.6 |         |
|              |     | Min. / Max.                 | 4 / 7       | 0.10 / 0.18     | 302 / 338                      | 60.4 / 67.6    |         |
|              | 10  | 5                           | 5           | 5               | 5                              | 5              |         |
|              |     | Mean $\pm$ S.D.             | 7 $\pm$ 1   | 0.17 $\pm$ 0.04 | 297 $\pm$ 21                   | 59.5 $\pm$ 4.2 |         |
|              |     | Min. / Max.                 | 5 / 9       | 0.13 / 0.23     | 278 / 331                      | 55.6 / 66.2    |         |
|              | 30  | 5                           | 5           | 5               | 5                              | 5              |         |
|              |     | Mean $\pm$ S.D.             | 4 $\pm$ 1   | 0.09 $\pm$ 0.01 | 307 $\pm$ 14                   | 61.5 $\pm$ 2.8 |         |
|              |     | Min. / Max.                 | 3 / 4       | 0.08 / 0.10     | 294 / 330                      | 58.8 / 66.0    |         |
|              | 100 | 5                           | 5           | 5               | 5                              | 5              |         |
|              |     | Mean $\pm$ S.D.             | 5 $\pm$ 1   | 0.13 $\pm$ 0.03 | 307 $\pm$ 28                   | 61.4 $\pm$ 5.6 |         |
|              |     | Min. / Max.                 | 4 / 7       | 0.10 / 0.18     | 258 / 328                      | 51.6 / 65.6    |         |

#### **Supplementary Fig. 4. Toxicities of various G9a inhibitors.**

(a) Rat myoblast H9c2 cells were treated with the indicated G9a inhibitors for 5 days, and cell viability was evaluated by WST-8. Data are mean  $\pm$  SD from three independent experiments. (b) HUDEP-2 cells were treated for 3 days, and cell viability was evaluated by WST-8. Data are mean  $\pm$  SD from three independent experiments. (c) Acute toxicity of various G9a inhibitors. Number of alive mice was shown during 2-week observation. N.D. is Not Determined. (d) Acute toxicity of RK-701 in mice. The body weight of individual mice was measured every 1–3 days after intravenous injection. Data are presented as mean  $\pm$  SD (n = 3 mice per group). (e) Mutagenic activity expressed as the number of revertants/plate in bacterial strains TA98 and TA100 exposed to RK-701, at various doses, with (+S9) or without (-S9) metabolic activation. Numbers represents averages from the two different experiments. AF-2 (2-(2-furyl)-3-(5-nitro-2-furyl)acrylamide) and B[a]P (benzo[a]pyrene) were used as positive controls. An asterisk indicates that insoluble material was detected. (f) The frequency of micronucleated polychromatic erythrocytes (MNPCE) and standard deviation of 4000 cells obtained from male rat treated with RK-701 via oral administration once a day for 2 weeks. MNCPE (%) and PCE (%) mean a proportion of MNPCE per 4000 PCE and a proportion of PCE, including MNPCE per 500 erythrocytes (n = 5 per group).

**a** DMSO 3  $\mu$ M RK-0133114

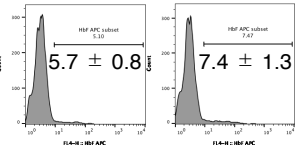

$P = 1.00$

RK-701

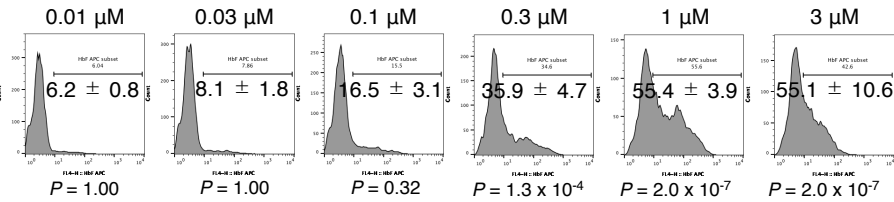

$P = 1.00$

$P = 1.00$

$P = 0.32$

$P = 1.3 \times 10^{-4}$

$P = 2.0 \times 10^{-7}$

$P = 2.0 \times 10^{-7}$

$P = 2.0 \times 10^{-7}$

**b**

Protein name: Hemoglobin subunit gamma-1 (UHBG1\_HUMAN)

Sequence coverage: 70%

Number of distinct sequences: 11

```

1  MGHFTEEDKA TITSLWGKVN VEDAGGETLG RLLVVVPTQT RFFDSFGNLS
51  SASAIMGNPK VKAHGKVLIT SLGDAIKHLD DLKGTFAQLS ELHCCKLHVD
101  PENFKLLGNV LVTVLAHPG KEFTPEVQAS WQKMTAVAS ALSRRYH
  
```

Protein name: Hemoglobin subunit beta (UHBG1\_HUMAN)

Sequence coverage: 83%

Number of distinct sequences: 11

```

1  MVHLTPEEKS AVTALWGKVN VDEVGGEALG RLLVVVPTQT RFFDSFGDLS
51  TDDAVMGNPK VKAHGKVLIT AFSDLAHLID NLKGTFAQLS ELHCCKLHVD
101  PENFKLLGNV LVCVLAHPG KEFTPEVQAA YQKVVAGVAN ALAHRKH
  
```

Protein name: Hemoglobin subunit alpha (HBA\_HUMAN)

Sequence coverage: 50%

Number of distinct sequences: 8

```

1  MVLSPADKTN VKAANGKVGK HAGEYGAEAL ERMFLSFPTT KTYVPHFDLS
51  HGSQVKGHGK KKVADALINA VAHVDDMFINA LSALSDLRHH KLVDFVFNFK
101  LLSHCLLVTL AARLPAEFTT AVHASLDRKFL ASVSTVLTISK YR
  
```

**c**

sequence: LHVDPENFK  
 protein: Hemoglobin subunit gamma-1  
 position: 97-105  
 precursor: m/z 549.7831 (2+)  
 210305\_QE\_MSI2\_scan1299#1 RT: 48 1 NL: 7.00E5  
 T: FTMS + p NSI d Full ms2 549.7831@hot28.00 [78.0000-1140.0000]

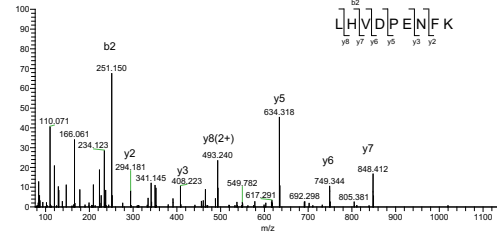

**d**

sequence: LHVDPENFR  
 protein: Hemoglobin subunit beta  
 position: 97-105  
 precursor: m/z 563.7859 (2+)  
 210305\_QE\_MSI2\_scan13423#1 RT: 50 1 NL: 2.00E6  
 T: FTMS + p NSI d Full ms2 563.7859@hcd28.00 [78.0000-1170.0000]

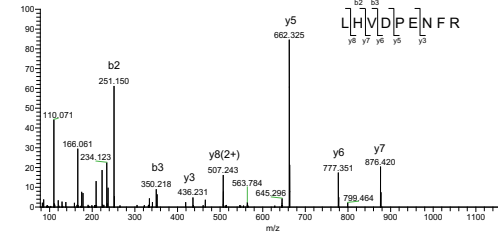

**e**

sequence: FLASVSTVLTSK  
 protein: Hemoglobin subunit alpha  
 position: 129-140  
 precursor: m/z 626.8624 (2+)  
 210305\_QE\_MSI2\_scan22749#1 RT: 71 1 NL: 3.00E6  
 T: FTMS + p NSI d Full ms2 626.8624@hot28.00 [86.6667-1300.0000]

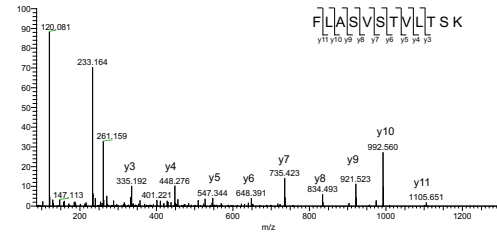

**f**

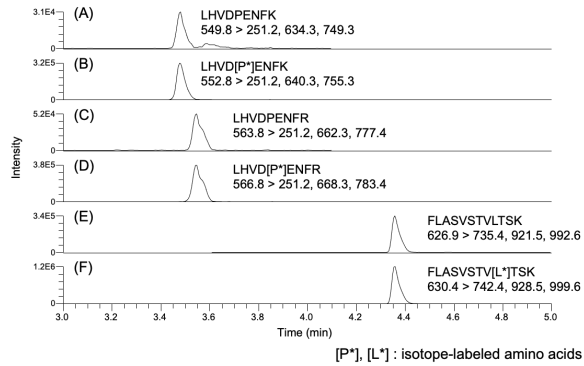

[\*], [\*]: isotope-labeled amino acids

**g**

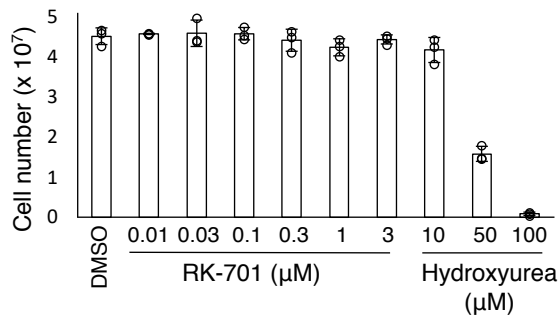

**h**

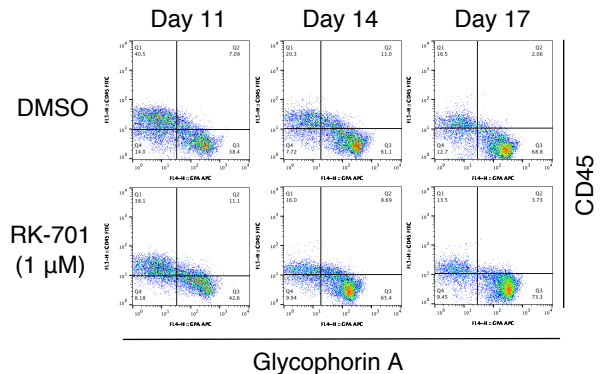

**Supplementary Fig. 5. Effect of G9a inhibitors and hydroxyurea on HbF induction, cell viability and differentiation of human erythroid cells.**

(a) Flow cytometric analysis of  $\gamma$ -globin expression in HUDEP-2 cells treated with RK-701 or RK-0133114 for 11 days. Percentages of HbF-expressing cells were determined by gating HbF-positive cells. Data are mean  $\pm$  SD from three independent experiments. (b) Peptides identified as part of the hemoglobin subunit by a Mascot database search are shown in bold. The underlined sequences were used as targets of MRM measurement. (c–e) The product ion spectrum from precursor peptides of hemoglobin subunit  $\gamma$ -1 (c),  $\beta$  (d), and  $\alpha$  (e) are labeled as b- and y-type ions. (f) The chromatograms in (A), (C), and (E) indicate native peptides formed by trypsinization, whereas those in (B), (D), and (F) are their internal standards containing the isotope-labeled amino acid. (g) CD34<sup>+</sup> cells were treated with RK-701 or hydroxyurea for 10 days under conditions favoring erythroid cell differentiation. Cell viability was measured by cell counting. Data represent means  $\pm$  SD from three independent experiments. (h) Flow cytometric analyses of erythroid cell differentiation from CD34<sup>+</sup> cells in days 11, 14, and 17. CD45 and glycophorin A were used as markers for hematopoietic cells and erythroid cells, respectively. *P*-value was calculated by one-way ANOVA with Tukey's post hoc test.



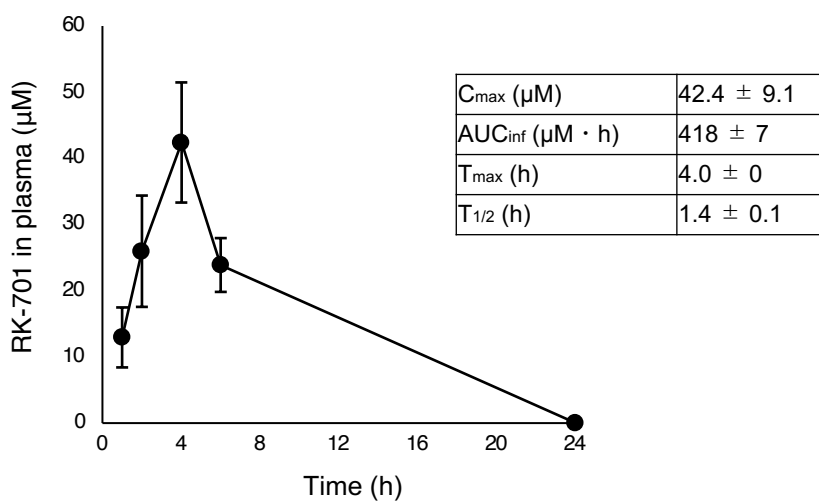

**Supplementary Fig. 6. *In vivo* pharmacokinetic properties of RK-701 in mice.**

Time course of the RK-701 concentration in plasma after a single intraperitoneal administration (25 mg/kg) was measured by LC–MS/MS. Data are means  $\pm$  s.e.m. (n = 3 mice).

**a**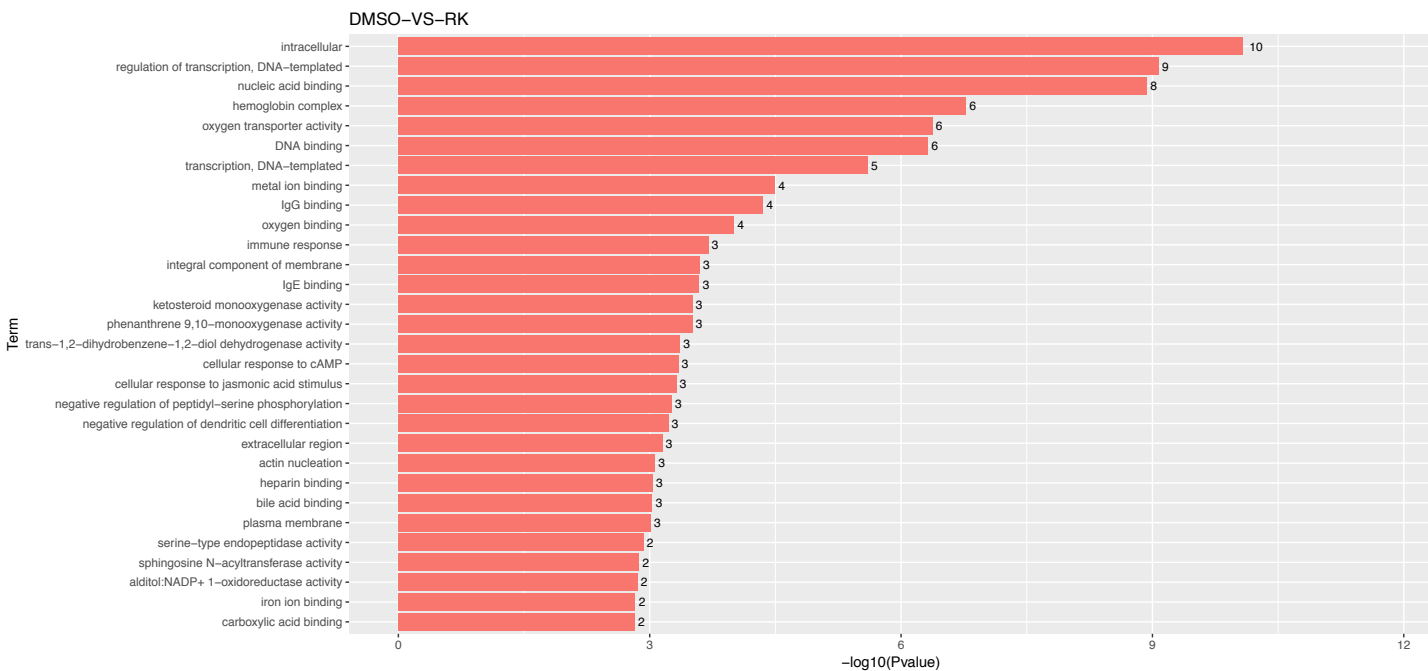**b**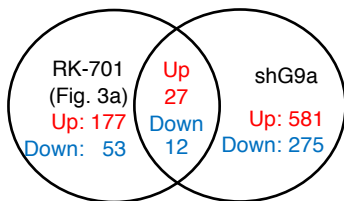

### Supplementary Fig. 7. RNA-seq analyses for G9a inhibition in HUDEP-2 cells.

(a) Gene Ontology (GO) enrichment  $p$ -value histogram used gene list is Supplementary Table 6. X axis:  $-\log_{10}(p\text{-value})$  of each term. Y axis: significant enriched GO term. The number differentially expressed genes in each GO term is shown in the histogram with the specification of the relevant biological process, cellular component and molecular function. Shown is the top 30 most prominent GO categories. All the output is shown if the analysis returns less than 30 outputs. The software we used here is Goseq<sup>1</sup>, which based on an extension of the hypergeometric distribution known as the Wallenius non- central hypergeometric distribution. This method is able to account for gene length bias and read counts bias when performing GO analysis. Threshold for filtering here is: over represented  $p$ -value  $\leq 0.05$ . The statistical test was performed by Wallenius in goseq software. (b) Venn diagram showing the overlap of differentially expressed genes between treatment with 1  $\mu\text{M}$  RK-701 for 4 days and shRNA-mediated G9a knockdown in HUDEP-2 cells. Results from three biological replicates are shown.

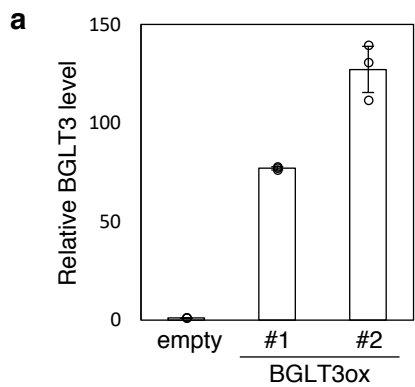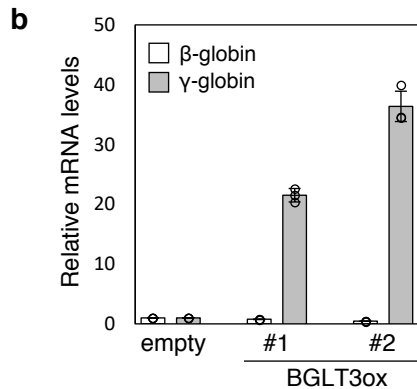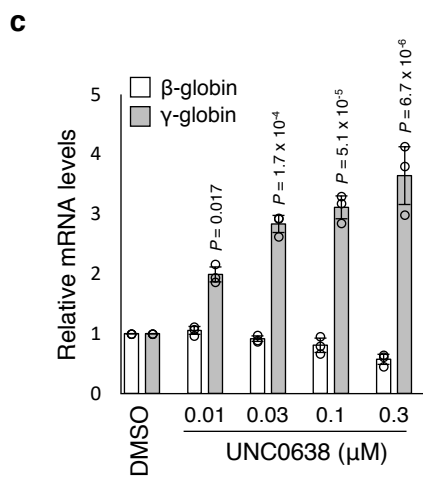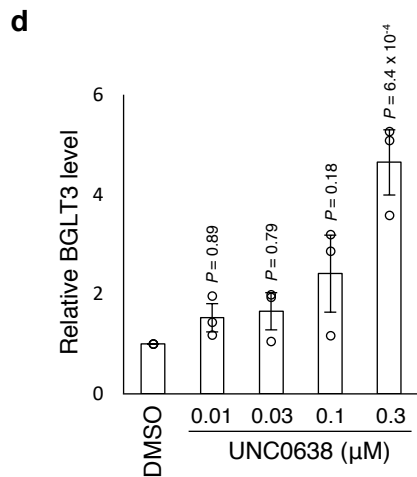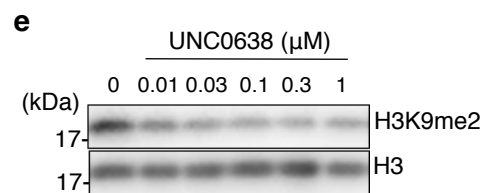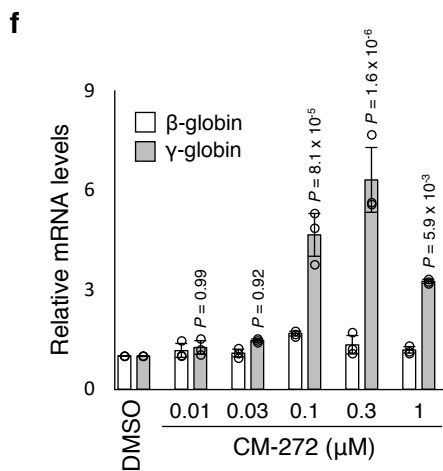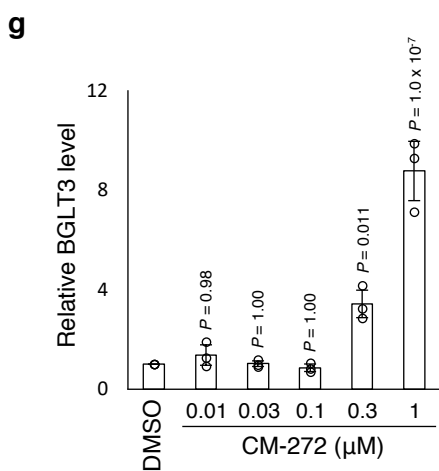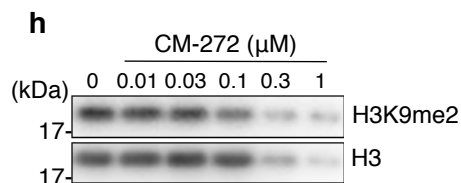

**Supplementary Fig. 8. Induction of fetal globin by G9a inhibition via BGLT3 in HUDEP-2 cells.**

(a) Validation of BGLT3 overexpression by qPCR in HUDEP-2 cells. Data are mean  $\pm$  SD from three independent experiments. (b) Relative expression of  $\beta$ - and  $\gamma$ -globin genes in BGLT3-overexpressing HUDEP-2 cells. Data are mean  $\pm$  SD from three independent experiments. (c and d) Relative expression of  $\beta$ - and  $\gamma$ -globin (c) and BGLT3 (d) genes in HUDEP-2 cells treated with UNC0638 for 4 days. Data are mean  $\pm$  SD from three independent experiments. (e) Effects of UNC0638 on H3K9me2 in HUDEP-2 cells. HUDEP-2 cells were treated with different concentrations of UNC0638 for 4 days. Lysates were immunoblotted with the indicated antibodies. A representative image of three independent experiments was shown. (f and g) Relative expression of  $\beta$ - and  $\gamma$ -globin (f) and BGLT3 (g) genes in HUDEP-2 cells treated with CM-272 for 4 days. Data are mean  $\pm$  SD from three independent experiments. (h) Effects of CM-272 on H3K9me2 in HUDEP-2 cells. HUDEP-2 cells were treated with different concentrations of CM-272 for 4 days. Lysates were immunoblotted with the indicated antibodies. A representative image of three independent experiments was shown. *P*-value was calculated by one-way ANOVA with Tukey's post hoc test.

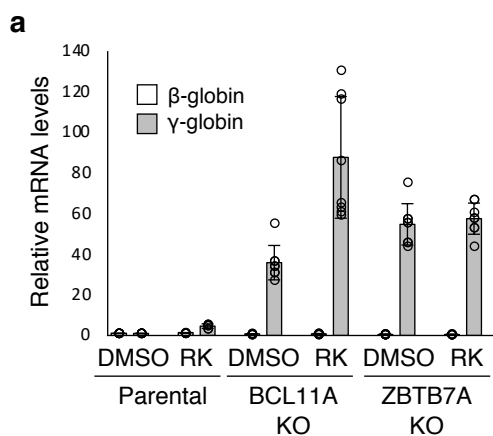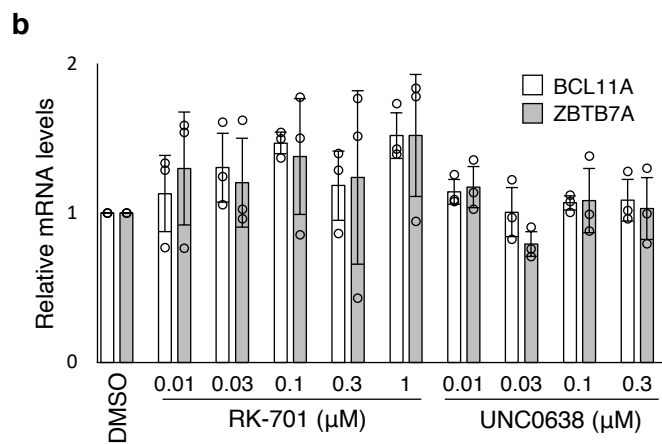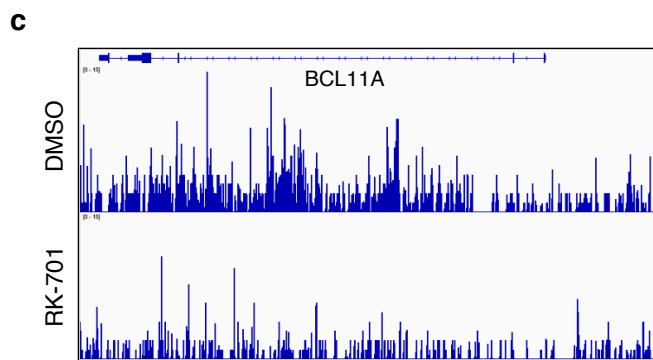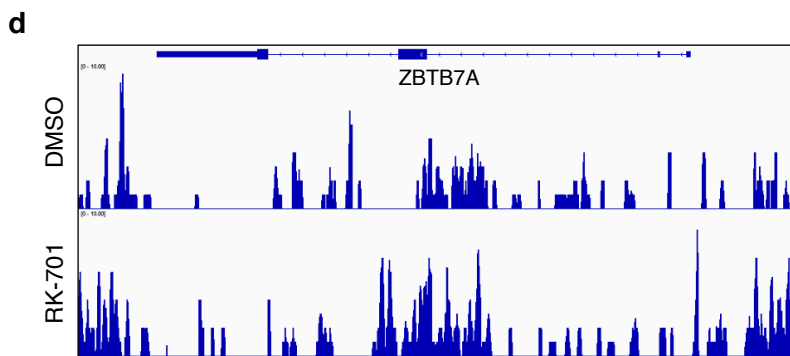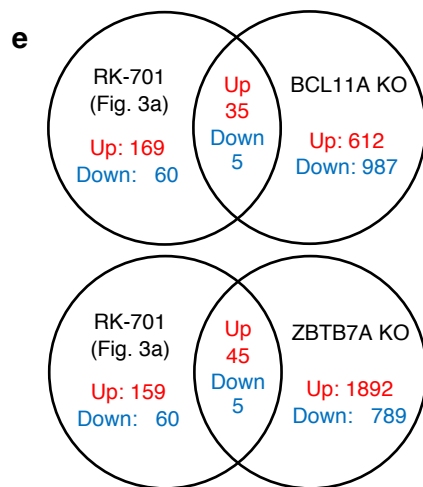

**Supplementary Fig. 9. Effect of RK-701 on gene expression of major fetal globin repressors and  $\gamma$ -globin, and H3K9me2 chromatin occupancy at the major fetal globin repressors locus.**

(a) Relative expression of  $\beta$ - and  $\gamma$ -globin in parental, BCL11A-, or ZBTB7A-knockout HUDEP-2 cells treated with 1  $\mu$ M RK-701 for 4 days. Data are mean  $\pm$  SD from three independent experiments. (b) Relative expression of BCL11A and ZBTB7A in HUDEP-2 cells treated with RK-701 or UNC0638 for 4 days. Data are mean  $\pm$  SD from three independent experiments. (c and d) ChIP-seq traces for H3K9me2 on the BCL11A (c) or ZBTB7A (d) gene locus in HUDEP-2 cells treated with 1  $\mu$ M RK-701 or DMSO for 4 days. A representative image of two independent experiments was shown. (e) Venn diagram showing the overlap of differentially expressed genes between treatment with 1  $\mu$ M RK-701 for 4 days in HUDEP-2 cells and BCL11A- or ZBTB7A-knockout HUDEP-2 cells. Results from three biological replicates was shown.

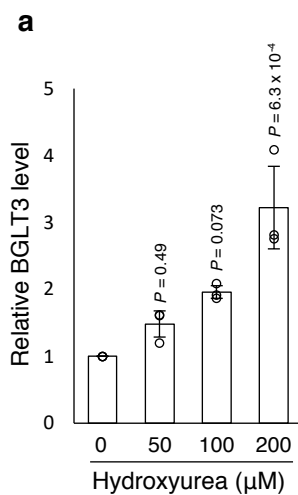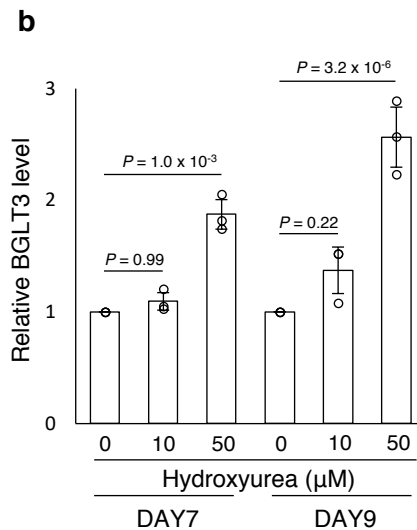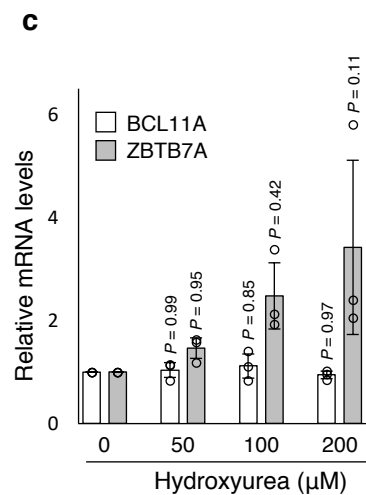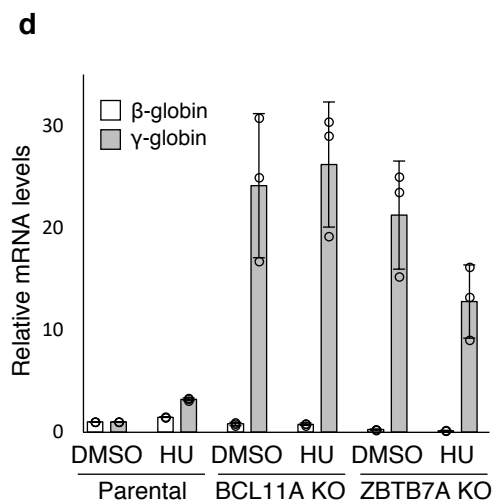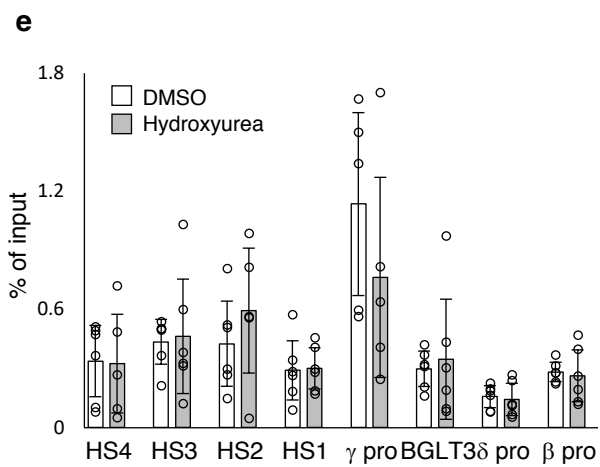

**Supplementary Fig. 10 Effect of hydroxyurea on BGLT3 and repressors gene expression and H3K9me2 chromatin occupancy in HUDEP-2 cells.**

(a) Induction of BGLT3 by hydroxyurea. Relative expression of BGLT3 in HUDEP-2 cells treated with indicated concentrations of hydroxyurea for 4 days. Data are mean  $\pm$  SD from three independent experiments. (b) Relative expression of BGLT3 in CD34<sup>+</sup> cells treated with indicated concentrations of hydroxyurea (HU) for 7 or 9 days. Data are mean  $\pm$  SD from three independent experiments. (c) Relative expression of BCL11A and ZBTB7A in HUDEP-2 cells treated with indicated concentrations of hydroxyurea for 4 days. Data are mean  $\pm$  SD from three independent experiments. (d) Relative expression of  $\beta$ - or  $\gamma$ -globin in hydroxyurea-treated BCL11A- or ZBTB7A-knockout cells. Data are mean  $\pm$  SD from three independent experiments. (e) ChIP-qPCR analyses using antibodies against H3K9me2 in HUDEP-2 cells treated with 200  $\mu$ M hydroxyurea or DMSO for 4 days. Data are mean  $\pm$  SD from three independent experiments. *P*-value was calculated by one-way ANOVA with Tukey's post hoc test.



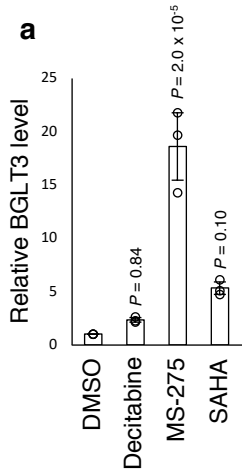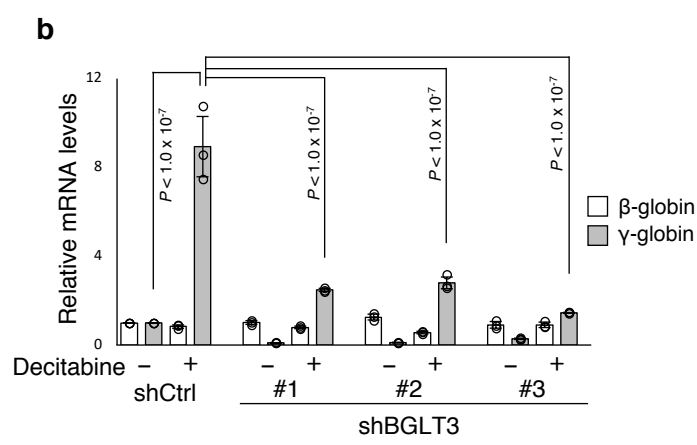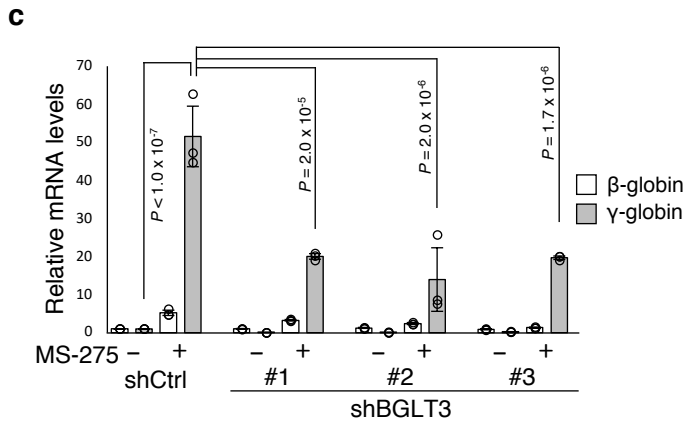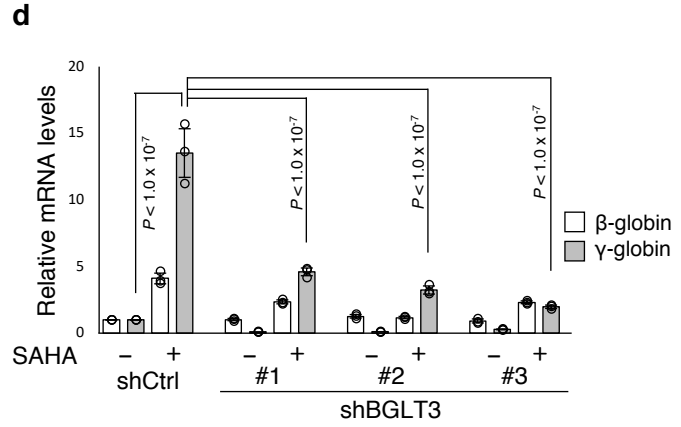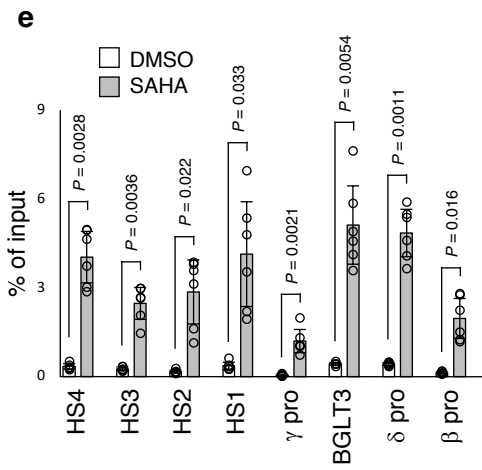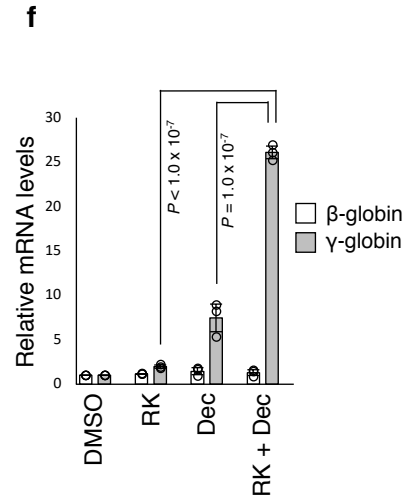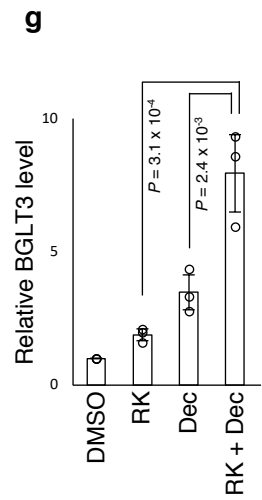

**Supplementary Fig. 11. Involvement of BGLT3 in  $\gamma$ -globin induction by HbF inducers.**

(a) Relative expression of *BGLT3* in HUDEP-2 cells treated with the indicated 1  $\mu$ M inhibitors for 3 days. Data are mean  $\pm$  SD from three independent experiments. (b–d) Relative expression of  $\beta$ - and  $\gamma$ -globin genes in BGLT3-knockdown HUDEP-2 cells treated with 1  $\mu$ M decitabine (b), 1  $\mu$ M MS-275 (c), or 1  $\mu$ M SAHA (d) for 3 days. Data are mean  $\pm$  SD from three independent experiments. (e) CHIP-qPCR analyses using antibodies against H3K9ac in HUDEP-2 cells treated with 1  $\mu$ M SAHA or DMSO for 1 day. Data are mean  $\pm$  SD from three independent experiments. (f and g) Relative expression of  $\beta$ - and  $\gamma$ -globin (f) and BGLT3 (g) genes in HUDEP-2 cells treated with 1  $\mu$ M RK-701 and decitabine for 3 days. Data are mean  $\pm$  SD from three independent experiments. *P*-value was calculated by one-way ANOVA with Tukey's post hoc test except for (e), calculated by two-tailed *t*-test.

**HBG1\_exon3**

BGLT3 sequence

- 1. 3670 nt (**bold**, Guo, G. et al. *Oncogene*. **34**, 1768-1779 (2015)., Accession#: KF110790)
- 2. 1684 nt (**magenta**, Ivaldi, M. S. et al. *Blood*. **132**, 1963-1973 (2018).)

[binding motif: **BCL11A**, **ZBTB7A**]

ctcctgggaaatgtgctggtgaccggtttggcaatccattcggcaagaaitcaccctgagggtgcaggcttctcctggcagaagatggtgactgcagtgcc  
cagtgcccgtgctccagataccacigagctcactgcccattgattcagagcttcaaggataggctttattctgcaagcaatacaataataaatctattctg  
ctgagagatcacacatgatttctcagctcttttttaccatcttttaaatatagagccacaagggtttatattgaggggaagtgtgtatgtgtattctgc  
atgcctgtttgtttggtgtgtcatgctcctcattttttatagagatgtgcattttgatgagcaataaaagcagtaaagacactgtaca  
cgggagttctgcaagtgggagtaaaggtgttaggagaaatccgggtgggaagaaagacctctataggacaggacttctcagaacagatgt  
tttggagagatgggaaaaggtcagtgaaagacctgggggctggattgattgcagctgagtagcaaggatggttcttaaggaagggaag  
gtttccaagcttaggaattcaaggtttagtcagggttagcaattcattttattaggaggaataactatttctaattggcacttagctttcacagccc  
ttgtggatgcctaagaaagtgaattaatcccatgccctcaagtgtgcagat**tggtca**cagcattcaaggagagacctcattgtaagac  
tctggggagggtgggacttaggtgtaagaaatgaatcagcagaggctcacaagtcagcatgagcatgttatgtctgagaaacagaccag  
cactgtgagatcaaaatgtagtgggaagaattgtacaacattaattggaaggcttacttaattggaattttgtatagtggatgttagtgcattc  
tataagtaagagtttaatatgatggtgttacggacctaatgtttgtgtcctcaaaattcacatgctgaatcccaactcccaactgaccttact  
gtgggggaggctttgaaaagtaattaggttagatgagctcataagagcagatccccatcataaaattttccttatcagaagcagagaga  
caagccatttcttctcccgtgaggacacagtgagaagtcggccatctgcaatccaggaagagaacct**tgacca**cgagtcagcct  
tcagaaatgtgagaaaaactctgtttggaagccaccagctttgtattttgtatagcactgactgagtaaggcagatgaagaagga  
gaaaaaataagcttgggtttgagtgactacagaccatgtttatctcaggttgcaaaagctcccctgctcccctatgtttcagataaaaatc  
ctactctactctcatctataa**gacc**caataataagcctgccccttctctacttcttaactttgatttctctattttacttcaacatgctttactta  
gccttgaatgtctttacatacagtgaaatglaaagtctttattctttttctttctttcttctcctcagcctcagaattggcacatgcccttctt  
ctttcaggaacttctcaacatctctgcctggctccatcatataaaaggtcccacttcaaatgcaactaccgtttcagaatagcactttc  
ttctttttgtttttgttttttaagtcaaaagcaaatcttgagagagtaagaaataaacgaatgactactgcataggcagagcagccccgag  
ggcctggtgttctttatggttattcttgatgatgttaaacaggtttggattattatgccttctcttttaggccatataaggtaactttctg  
acattgccatggcattttctttaaattactgttacctaaattcaggggtacaggtacaggtatgcagggtttgtttataggtaaaagtgtg  
ccatggtttaatgggtttttttctgttaaagttgtaagttctgtttactctggatattaggcctttgctcagaagaatagattggaaaatctttt  
ccattctgtagattgtcttctgctctgatggttagtttctgtgagcaggagctcttagtttaattagattccatt**tggtca**attttgccttctgctg  
aattgctttcac**gcttcatc**atgaaatctgtg**cccg**gtttatataatgaatagattgccttgattttttc**lagg**cttttatagttgggtttttc**at**  
**taag**tctctaatccatctggagtaattttggataaggataaggaaggagtcagtttcattttcagcatatggctagccagttctccccatc  
attatataaattgaaatcctttcccattgcttctgtcaggtttctaaaagaccagatgggttaggtacaatatgcagtttcttcaagtcatat  
aataccatctgaaatctcttataattcatttcttttagatgtatgctggtctcctctgctcactatagtgagggcaccattagccagagaatctgt  
ctgctagttcatgtaagattcagaattaagaaaaatggatggcatalgaatgaaacttcatggatgacatatggaatctaataatgtattgtg  
aattaatgcataagatgcaacagagagaagttgacaactgcaatgataacctggattgatgataaagagctatagatcacagtagaagc  
aataatcatgaaaaacaattggaaatgggaacagccacaacaagaagaatcaatactccaggaaagtgactgcagggtcacttttctt  
ggagcgggtgagagaaaagtggaaatgtagcagtaactgctgaattcctggttgctgatggaagatggggcagctgttactggttacgc  
agggttttagatgtatgtacctaaggatagaggtatggcaatgaacagaaatctttgggaatgagtttagggccattaaggacatgacc  
tgaagttcctctgaggccagtccccacaactcaatataaatgtgttctctgcatatagtcaaagtgccacttcttttctcatalcatcagatctt  
gctctaaagataatcttggtttgctcaaaactgtttgctactcaaaactttcccattgctcctaagtaaaacaggttaactgcctctcaactatc  
aagtagactaaaatattgtgtctctaatatcagaattcagcttaatatattgggttaactctttgaaatttagagcttcttgaatacacatgg  
gggtgatttctaaactttatttctgttaaggattatctcaggggtaacacacaaaccagcatcctgaaccttaagtatgaggacagtaagc  
cttaagaatataaaataaactgttcttctctgcccgggtggaagtgtgccctgtctattcctgaaattgctgtttgagacgcatgagacgtgcag  
cacatgagacacgtgcagcagcctgtggaatattgtcagtgagaatgtctttgctgattagatataaagacaagttaaacacagcattaga  
ctatagatcaagcctgtgccagacacaaatgacctaatgccagcacggggccacggaatctctatccttctgttgaacagagcagcac  
acttctcccccaacactattagatgttctggcataattttgtagatgttaggattgacatggactattgttcaatgattcagaggaaatctcctt  
gttcagataagtagactgactactaaatggattaaaaaaacacagtaataaaaccagtttcccctta

**Supplementary Fig. 12 Recognition motifs of BCL11A and ZBTB7A in the BGLT3 gene locus.**

The nucleic acid sequence of BGLT3 downstream of HBG1 is shown. Two predicted BGLT3 transcripts have been reported: 3670 nt (Accession# KF110790, black bold)<sup>2</sup> and 1684 nt (magenta background)<sup>3</sup>. Sequences predicted to be recognized by BCL11A<sup>4</sup> or ZBTB7A<sup>5</sup> are highlighted by a gray or red background, respectively. The HBG1 gene region (exon3) is shown in white on a black background.

Supplementary Fig. 13-1

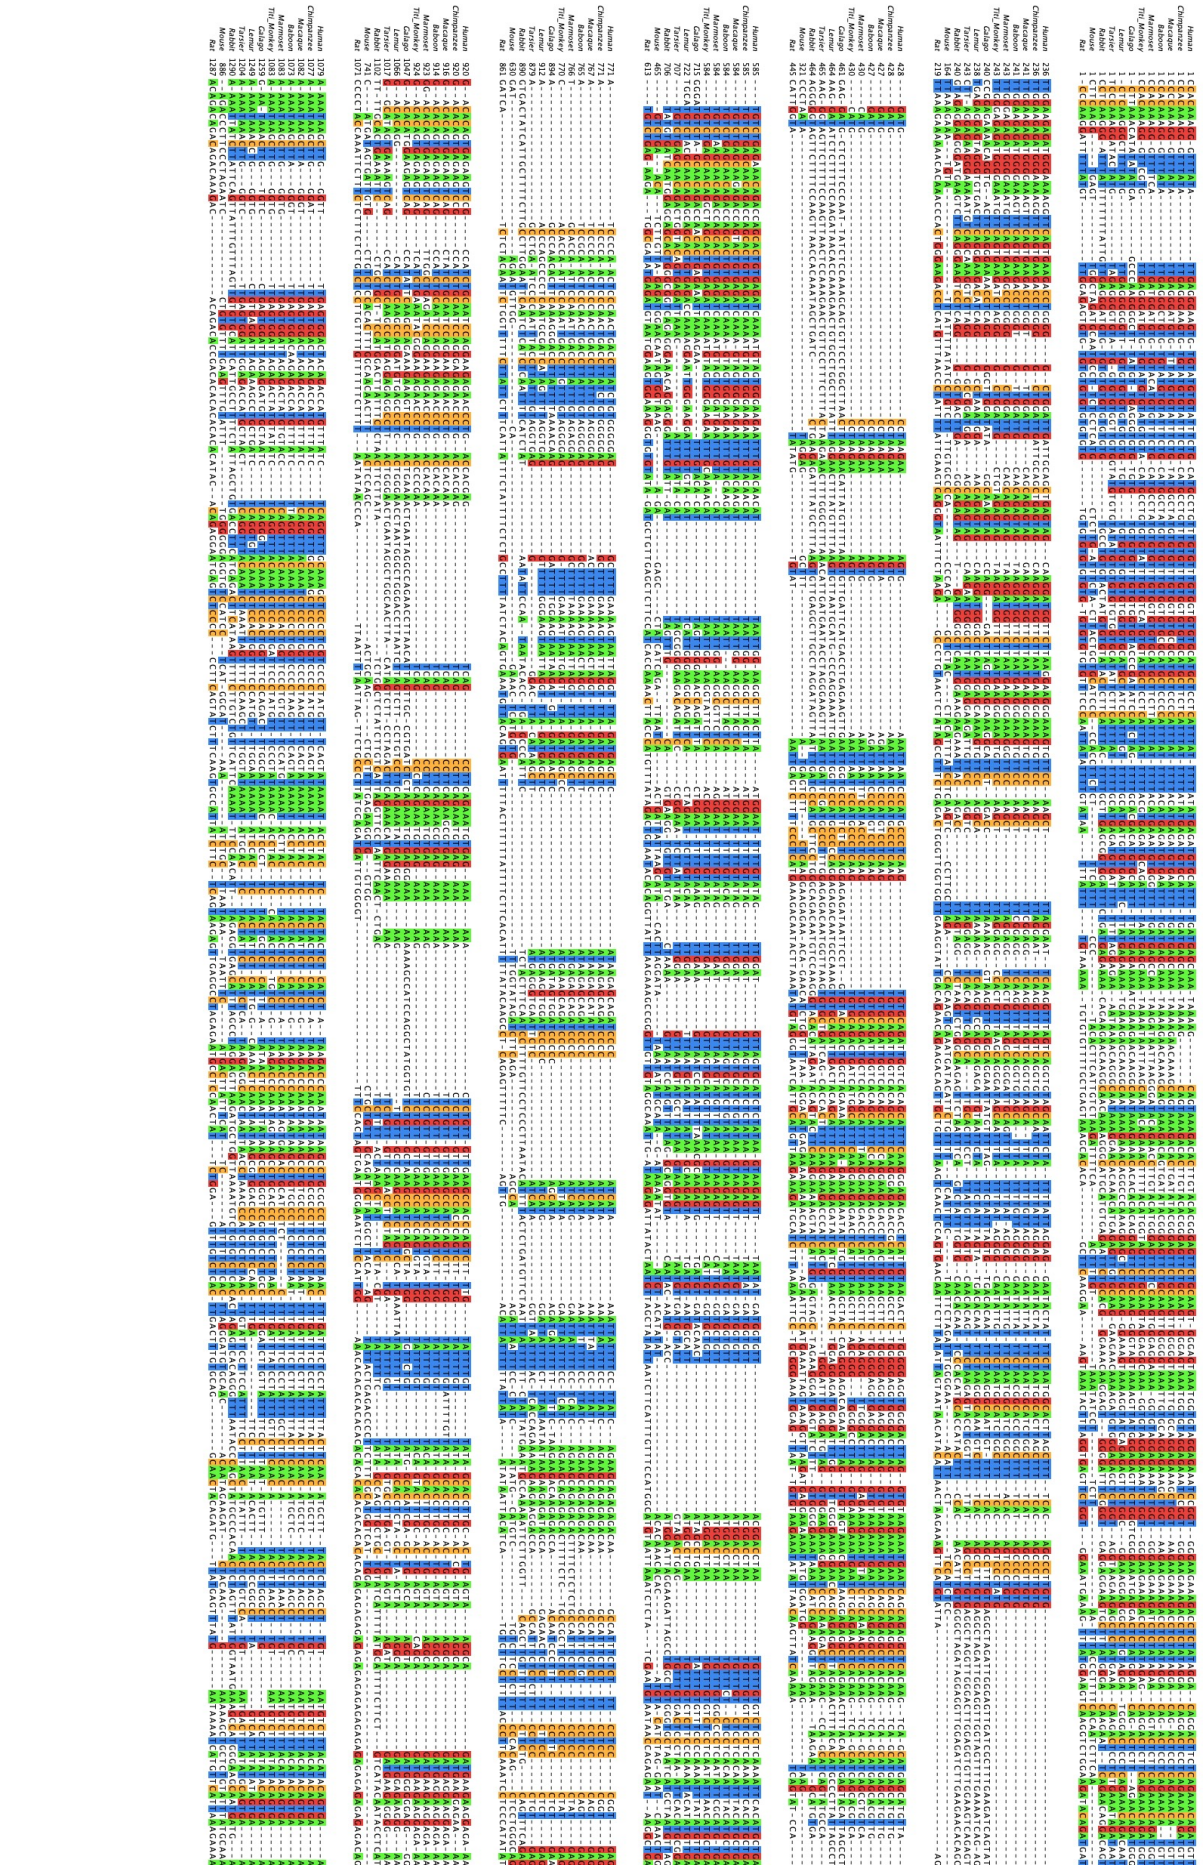

Supplementary Fig. 13-2

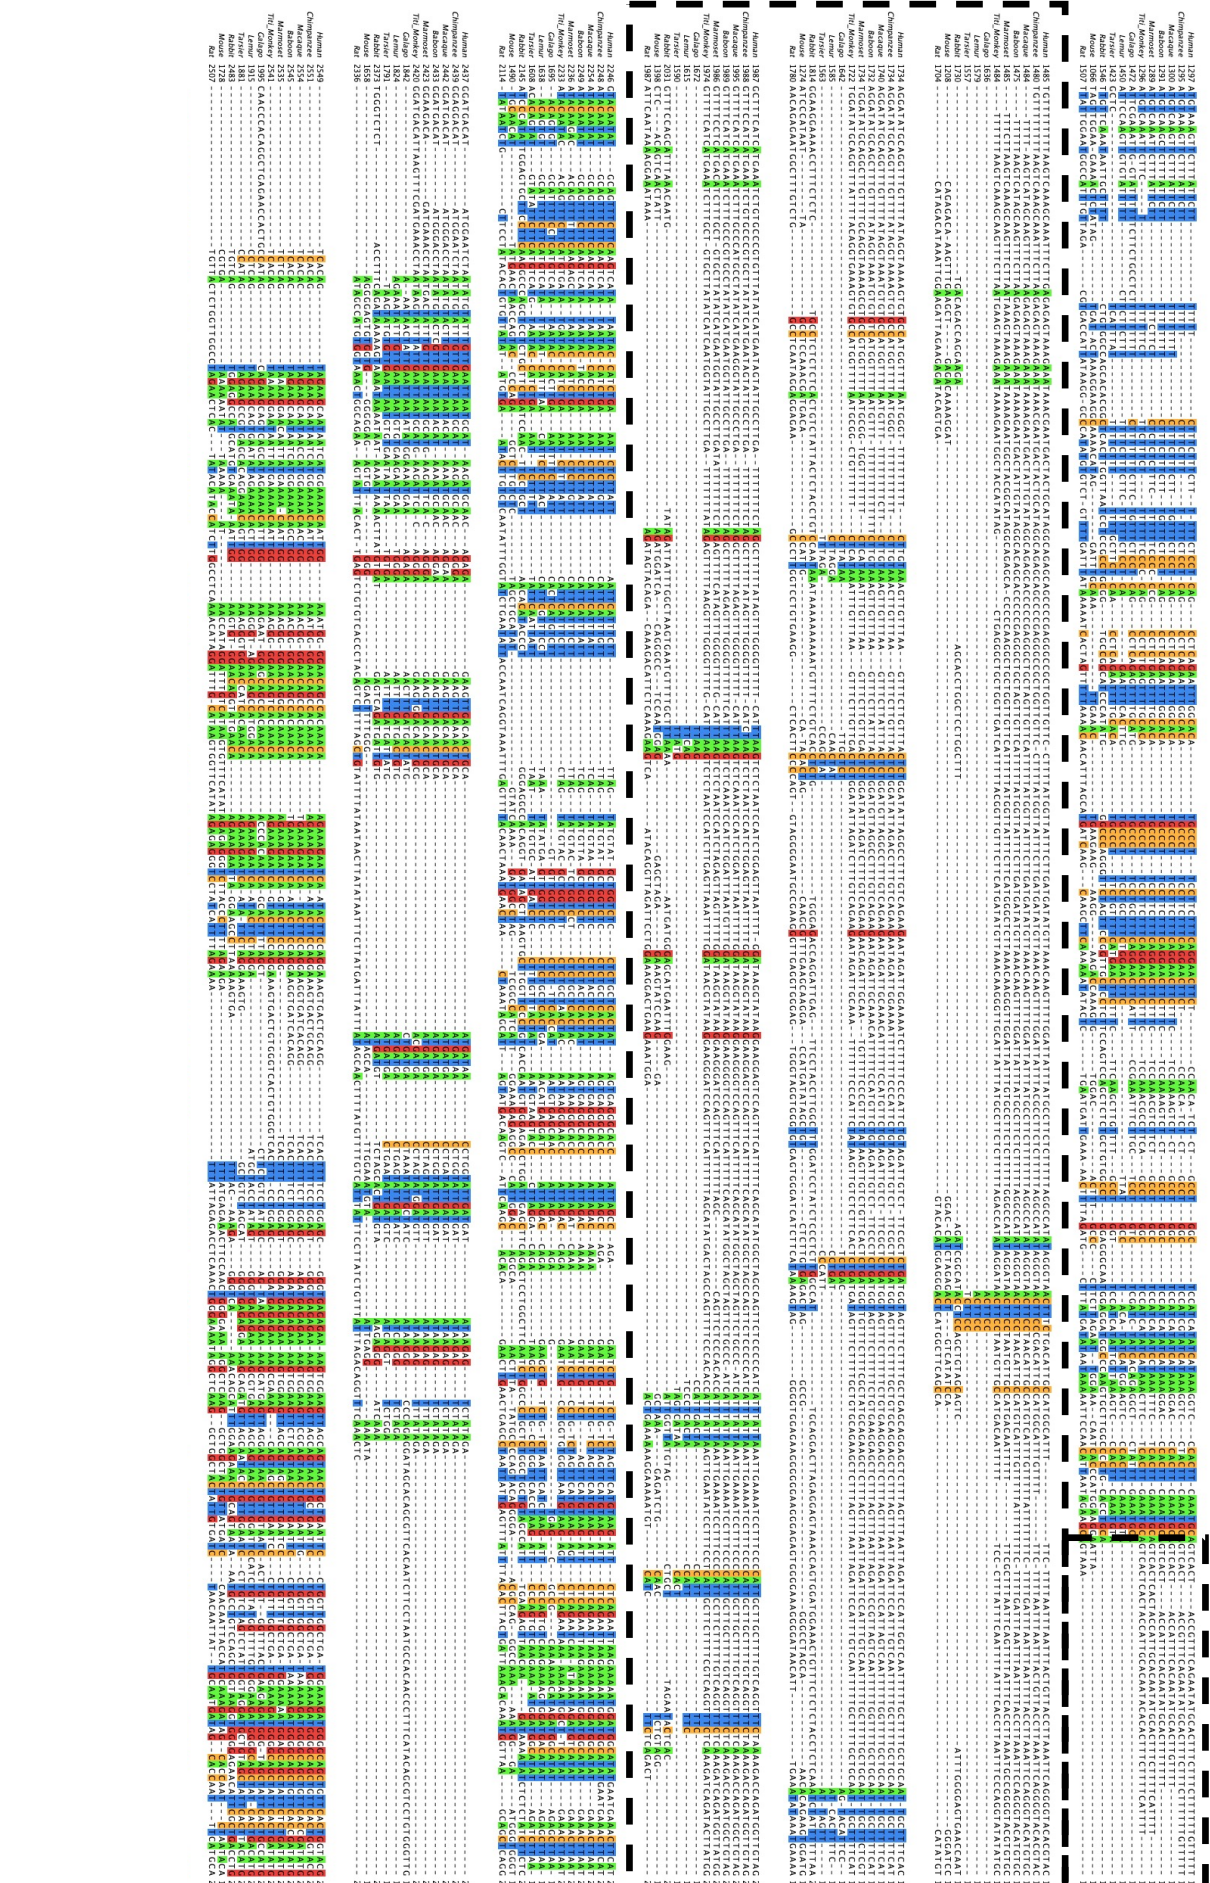



**Supplementary Fig. 13 Multiple sequence alignment of the gene locus corresponding to BGLT3 in 12 mammalian species, including humans.**

The predicted BGLT3 sequences of 11 mammalian species were obtained from the National Center for Biotechnology Information (NCBI) database, and were inferred based on the human BGLT3 sequence (3670 nt, see Supplementary Fig. 12). The alignment of 12 mammalian species was assessed by JalView. Bases with over 70% conservation in the alignment columns are colored (green: A, blue: T, red: G, and orange: C). The region enclosed by the dotted black line represents well-conserved sequences among Human, Chimpanzee, Macaque, Baboon, Marmoset, and Titi Monkey.



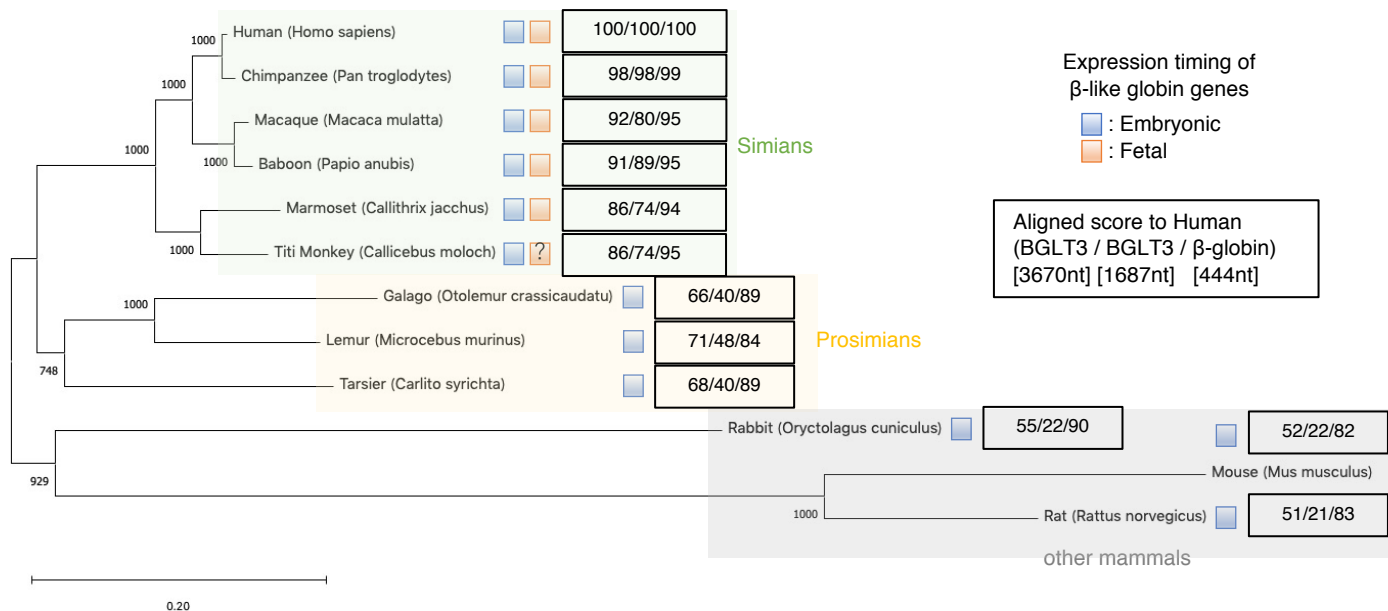

### Supplementary Fig. 14 Conservation of BGLT3 sequences and expression timing of $\beta$ -like globin among various mammals.

Molecular dendrogram of the BGLT3 gene and expression timing of the  $\beta$ -like globin gene. The phylogenetic tree was drawn based on the neighbor-joining (NJ) method (1,000 bootstrap repeats). The numbers above branches indicate bootstrap support values of the NJ method. The phylogenetic analysis was visualized using Molecular Evolutionary Genetics Analysis software. The expression timing of the  $\beta$ -like globin gene and the hierarchies of biologically relevant groupings are based on multiple studies<sup>6-8</sup>. Alignment scores between the human BGLT3 (long or short, see Supplementary Fig. 12 and 13) or  $\beta$ -globin gene and those in other organisms were evaluated using the default options of ClustalW.

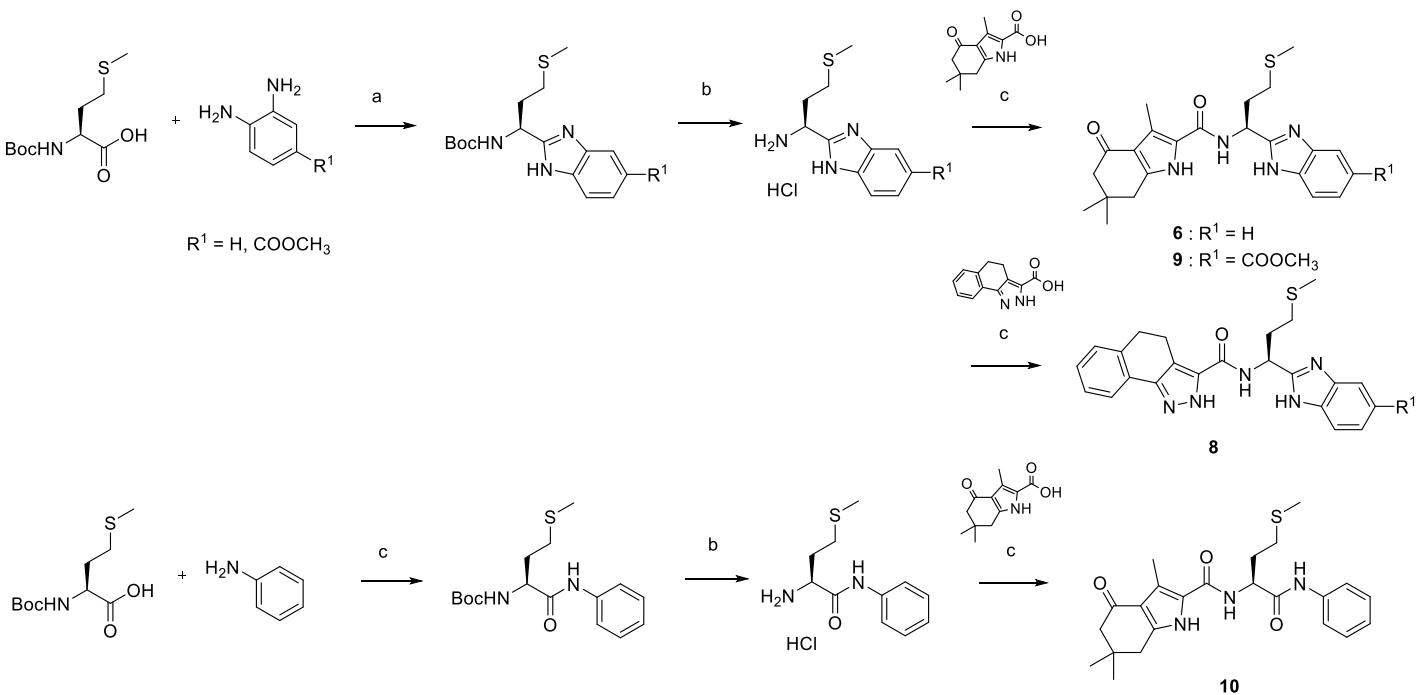

### Supplementary Fig. 15. Reagents and conditions:

(a) EDCI-HCl, HOBT-H<sub>2</sub>O, DIEA, DMF, rt; and then AcOH, 60°C ; (b) HCl/EtOAc, rt; (c) EDCI-HCl, HOBT-H<sub>2</sub>O, DIEA, DMF, rt.

Abbreviations: Boc, *tert*-butoxycarbonyl; DIEA, *N,N*-diisopropylethylamine; DMF, *N,N*-dimethylformamide; EDCI, 1-ethyl-3-(3-dimethylaminopropyl) carbodiimide; HOBT, 1,2,3-benzotriazol-1-ol.

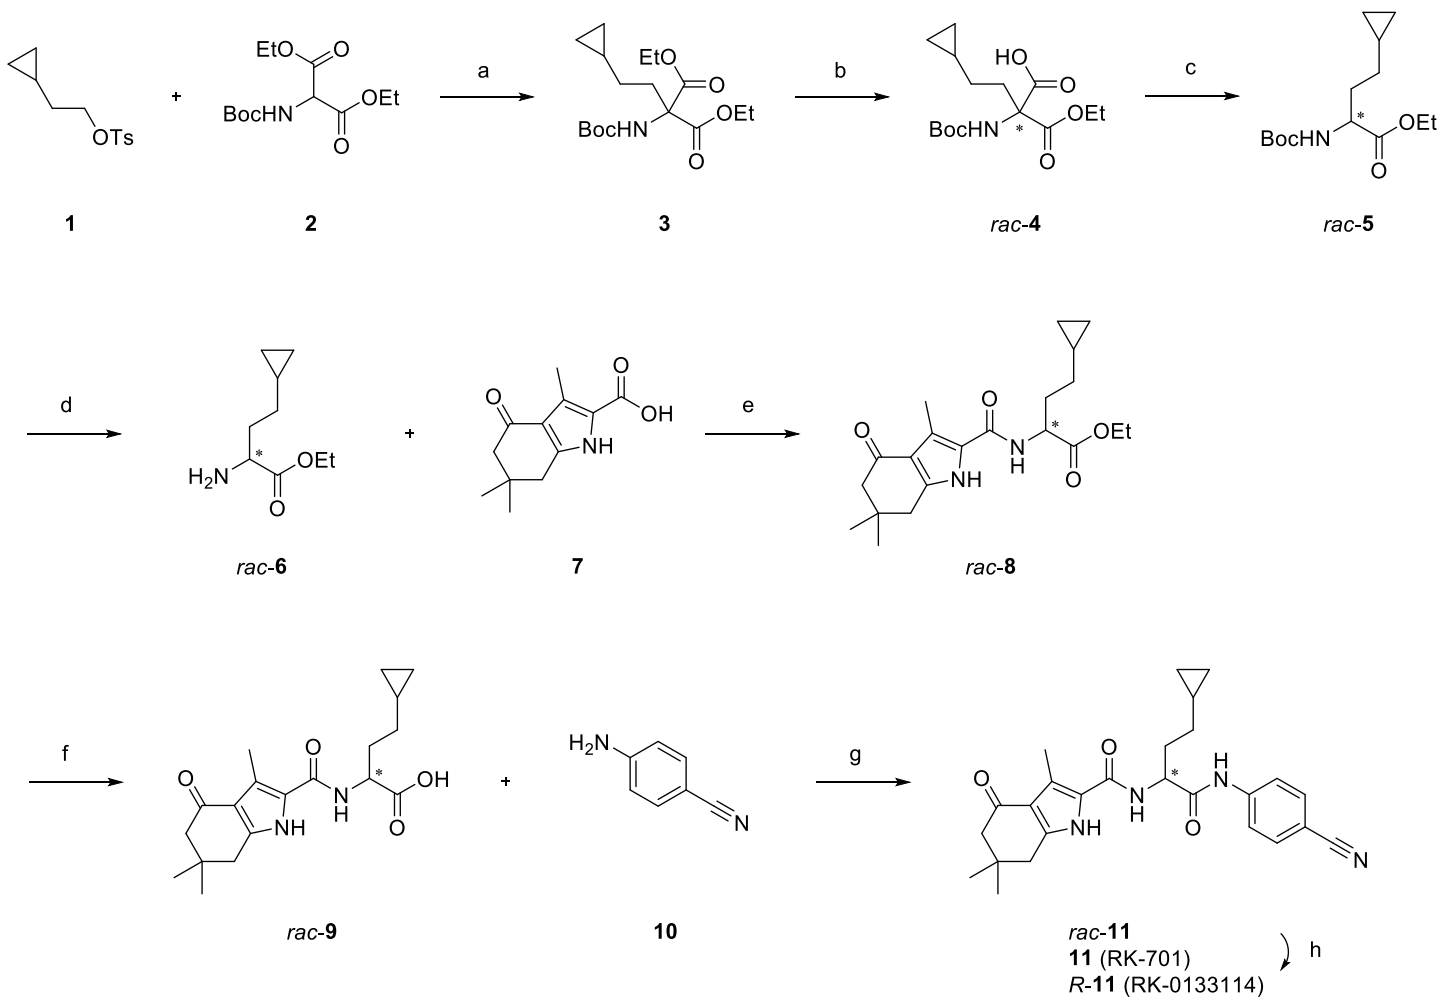

### Supplementary Fig. 16 Reagents and conditions:

(a) *tert*-BuOK, DMF, 70° C; (b) aq. KOH, EtOH, rt; (c) 1,2-diCIPh, 110° C; (d) TFA, CH<sub>2</sub>Cl<sub>2</sub>, rt; (e) EDCI-HCl, HOBT-H<sub>2</sub>O, DIEA, DMF, rt; (f) LiOH-H<sub>2</sub>O, EtOH/THF/H<sub>2</sub>O, rt; (g) DMT-MM nH<sub>2</sub>O, DMF, rt; (h) CHIRALPAK IA.

Abbreviations: Boc, *tert*-butoxycarbonyl; DIEA, *N,N*-diisopropylethylamine; DMF, *N,N*-dimethylformamide; DMT-MM, 4-(4,6-dimethoxy-1,3,5-triazin-2-yl)-4-methylmorpholinium chloride; EDCI, 1-ethyl-3-(3-dimethylaminopropyl) carbodiimide; HOBT, 1,2,3-benzotriazol-1-ol; TFA, trifluoroacetic acid; THF, tetrahydrofuran; Ts, *p*-toluenesulfonyl.

**Supplementary Table 1. Structure-activity relationship of G9a inhibitors.**

G9a activity was measured by the AlphaLISA-based assay. Data are mean  $\pm$  SD from three independent experiments.

| Compound    | Structure                                                                           | IC <sub>50</sub> ( $\mu$ M) |
|-------------|-------------------------------------------------------------------------------------|-----------------------------|
| 1           | 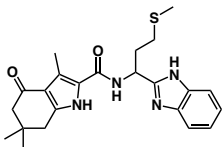   | 5.3 $\pm$ 1.0 $\mu$ M       |
| 2           |    | 1.4 $\pm$ 0.082 $\mu$ M     |
| 3           |    | > 100 $\mu$ M               |
| 4           |    | > 100 $\mu$ M               |
| 5           |   | > 100 $\mu$ M               |
| 6           |  | 88.2 $\pm$ 0.89 $\mu$ M     |
| 7           |  | > 50 $\mu$ M                |
| 8           |  | 21.3 $\pm$ 3.0 $\mu$ M      |
| 9           |  | 0.30 $\pm$ 0.013 $\mu$ M    |
| 10 (RK-701) |  | 0.027 $\pm$ 0.0023 $\mu$ M  |

## Supplementary Table 2. Selectivity against 4 DNA methyltransferases and 33 methyltransferases.

Compound was tested in a 5-dose IC<sub>50</sub> mode with 10-fold serial dilution, in duplicate, at 10 or 100  $\mu$ M. Control compounds, SAH (S-(5'-Adenosyl)-L-homocysteine) and Chaetocin, were tested in 10-dose IC<sub>50</sub> mode with 3-fold serial dilution starting at 100 or 200  $\mu$ M. Reactions were carried out at 1  $\mu$ M SAM. Curve fits were performed where the enzyme activities at the highest concentration of compounds were less than 65%. ND indicates compound not tested against enzyme.

| Methyltransferase | IC <sub>50</sub> ( $\mu$ M) |       |           |
|-------------------|-----------------------------|-------|-----------|
|                   | RK-701                      | SAH   | Chaetocin |
| ASH1L             | 79.4                        | ND    | 0.093     |
| DNMT1             | > 100                       | 0.13  | ND        |
| DNMT3a            | > 100                       | 0.30  | ND        |
| DNMT3b            | > 100                       | 0.11  | ND        |
| DNMT3b/3L         | > 100                       | 0.05  | ND        |
| DOT1L             | > 100                       | 1.70  | ND        |
| EZH1              | > 100                       | 22.8  | ND        |
| EZH2              | > 100                       | 13.8  | ND        |
| EZH2 (Y641F)      | > 100                       | 64.1  | ND        |
| G9a               | 0.023                       | 6.62  | ND        |
| GLP               | 0.053                       | 3.86  | ND        |
| MLL1              | > 100                       | 1.3   | ND        |
| MLL2              | > 100                       | 11.6  | ND        |
| MLL3              | > 100                       | 49.7  | ND        |
| MLL4              | > 100                       | 1.1   | ND        |
| NSD1              | > 100                       | 56.6  | ND        |
| NSD2              | > 100                       | 3.3   | ND        |
| NSD2 (E1099K)     | > 100                       | 6.5   | ND        |
| NSD2 (T1150A)     | > 100                       | 7.2   | ND        |
| NSD3              | > 100                       | ND    | 0.15      |
| PRDM9             | > 100                       | ND    | 13.4      |
| PRMT1             | > 100                       | 0.26  | ND        |
| PRMT3             | > 100                       | 2.4   | ND        |
| PRMT4             | > 100                       | 0.18  | ND        |
| PRMT5/MEP50       | > 100                       | 1.2   | ND        |
| PRMT6             | > 100                       | 0.41  | ND        |
| PRMT7             | > 100                       | 0.11  | ND        |
| PRMT8             | > 100                       | 0.24  | ND        |
| SET1b             | 48.6                        | 5.3   | ND        |
| SET7/9            | > 100                       | 81.8  | ND        |
| SET8              | > 100                       | 311.4 | ND        |
| SETD2             | > 100                       | 5.3   | ND        |
| SMYD1             | 52.7                        | 47.4  | ND        |
| SMYD2             | > 100                       | 1.9   | ND        |
| SUV39H1           | > 100                       | 90.6  | ND        |
| SUV39H2           | > 100                       | 20.2  | ND        |
| SUV420H1TV2       | > 100                       | 125.7 | ND        |

### Supplementary Table 3. Data collection and refinement statistics for complex.

| PDB ID                                  | 7X73                     |
|-----------------------------------------|--------------------------|
| <b>Data Collection</b>                  |                          |
| Beamline                                | SLS X06DA                |
| Wavelength (Å)                          | 1.000                    |
| Space group                             | <i>P</i> 1               |
| Unit cell dimensions                    |                          |
| <i>a</i> , <i>b</i> , <i>c</i> (Å)      | 43.2, 56.2, 66.5         |
| $\alpha$ , $\beta$ , $\gamma$ (°)       | 76.1, 72.5, 67.5         |
| Resolution (Å)                          | 42.90–1.49 (1.52–1.49) * |
| No. of unique reflections               | 86,112                   |
| Completeness (%)                        | 96.6 (94.1)              |
| Multiplicity                            | 3.6 (3.5)                |
| Mean <i>I</i> / $\sigma$ ( <i>I</i> )   | 15.1 (1.6)               |
| <i>R</i> <sub>sym</sub> (%)             | 4.8 (83.6)               |
| <i>R</i> <sub>pim</sub> (%)             | 3.0 (51.6)               |
| CC <sub>1/2</sub>                       | 0.999 (0.705)            |
| <b>Refinement</b>                       |                          |
| <i>R</i> <sub>work</sub> (%)            | 16.7                     |
| <i>R</i> <sub>free</sub> (%)            | 19.3                     |
| RMSD bond lengths (Å)                   | 0.006                    |
| RMSD bond angles (°)                    | 0.872                    |
| No. of reflections (total)              | 86,078                   |
| No. of reflections (test set)           | 4,183                    |
| No. of atoms                            |                          |
| Total                                   | 5,142                    |
| Protein                                 | 4,416                    |
| Inhibitor                               | 66                       |
| Coenzyme                                | 54                       |
| Water                                   | 578                      |
| Other                                   | 28                       |
| Mean <i>B</i> -factor (Å <sup>2</sup> ) |                          |
| Overall                                 | 30.7                     |
| Protein                                 | 30.3                     |
| Inhibitor                               | 28.5                     |
| Coenzyme                                | 22.0                     |
| Water                                   | 35.1                     |
| Other                                   | 32.9                     |
| Ramachandran plot (%)                   |                          |
| Favored                                 | 95.9                     |
| Allowed                                 | 4.1                      |

\*Values in parentheses are for the highest-resolution bin.

**Supplementary Table 4. Biochemical property of RK-701.**

A to B: Apical to Basal; B to A: Basal to Apical. Data of solubility, PAMPA, and Caco-2 permeability represent means  $\pm$  SD from at least three independent experiments, while data of metabolic stability represent averages from two independent experiments.

---

|                                              |                 |
|----------------------------------------------|-----------------|
| Solubility in PBS ( $\mu$ M)                 |                 |
| pH6.8                                        | 26.3 $\pm$ 3.2  |
| pH7.4                                        | 10.9 $\pm$ 2.2  |
| PAMPA permeability ( $\times 10^{-6}$ cm/s)  | 3.08 $\pm$ 1.47 |
| Caco-2 permeability ( $\times 10^{-6}$ cm/s) |                 |
| Papp A to B                                  | 5.23 $\pm$ 0.47 |
| Papp B to A                                  | 18.9 $\pm$ 0.92 |
| Efflux ratio (B to A/A to B)                 | 3.6             |
| Metabolic stability in liver microsomes      |                 |
| CLint (mL/min/mg protein)                    |                 |
| Human                                        | 0.019           |
| Monkey                                       | 0.067           |
| Dug                                          | 0.028           |
| Rat                                          | 0.033           |

---

**Supplementary Table 5. Hematological and hepatic parameters of rats treated with RK-701 for two weeks.**

| RK-701 (mg/kg)                           | 0               | 10              | 30              | 100             |
|------------------------------------------|-----------------|-----------------|-----------------|-----------------|
| RBC (x 10 <sup>4</sup> cells/ $\mu$ L)   | 721 $\pm$ 15    | 741 $\pm$ 19    | 726 $\pm$ 36    | 728 $\pm$ 17    |
| HGB (g/dL)                               | 14.8 $\pm$ 0.5  | 15.1 $\pm$ 0.7  | 14.5 $\pm$ 0.5  | 14.8 $\pm$ 0.3  |
| HCT (%)                                  | 42.6 $\pm$ 1.3  | 43.7 $\pm$ 1.7  | 42.6 $\pm$ 1.4  | 42.9 $\pm$ 1.1  |
| MCV (fL)                                 | 59.2 $\pm$ 1.7  | 58.9 $\pm$ 1.6  | 58.7 $\pm$ 2.6  | 59.0 $\pm$ 0.7  |
| MCH (pg)                                 | 20.5 $\pm$ 0.8  | 20.4 $\pm$ 0.6  | 20.0 $\pm$ 1.0  | 20.3 $\pm$ 0.2  |
| MCHC (g/dL)                              | 34.6 $\pm$ 0.8  | 34.6 $\pm$ 0.3  | 34.0 $\pm$ 0.5  | 34.4 $\pm$ 0.3  |
| Retic (x 10 <sup>9</sup> cells/L)        | 221 $\pm$ 30.5  | 190 $\pm$ 28.3  | 228 $\pm$ 37.5  | 179 $\pm$ 45.9  |
| PLT (x 10 <sup>4</sup> cells/ $\mu$ L)   | 129 $\pm$ 16.5  | 128 $\pm$ 11.2  | 122 $\pm$ 15.7  | 113 $\pm$ 10.8  |
| WBC (x 10 <sup>2</sup> cells/ $\mu$ L)   | 63.1 $\pm$ 19.4 | 59.8 $\pm$ 12.2 | 61.6 $\pm$ 9.2  | 74.8 $\pm$ 16.8 |
| Lymph (x 10 <sup>2</sup> cells/ $\mu$ L) | 50.1 $\pm$ 14.5 | 51.4 $\pm$ 10.7 | 53.0 $\pm$ 10.3 | 64.6 $\pm$ 14.9 |
| NEUT (x 10 <sup>2</sup> cells/ $\mu$ L)  | 10.6 $\pm$ 4.5  | 6.4 $\pm$ 1.7   | 6.7 $\pm$ 2.1   | 7.8 $\pm$ 2.9   |
| EOS (x 10 <sup>2</sup> cells/ $\mu$ L)   | 0.8 $\pm$ 0.2   | 0.6 $\pm$ 0.1   | 0.5 $\pm$ 0.1   | 0.6 $\pm$ 0.2   |
| MONO (x 10 <sup>2</sup> cells/ $\mu$ L)  | 1.2 $\pm$ 0.9   | 0.9 $\pm$ 0.2   | 0.9 $\pm$ 0.1   | 1.2 $\pm$ 0.4   |
| LUC (x 10 <sup>2</sup> cells/ $\mu$ L)   | 0.4 $\pm$ 0.2   | 0.4 $\pm$ 0.2   | 0.4 $\pm$ 0.1   | 0.5 $\pm$ 0.2   |
| AST (IU/L)                               | 58 $\pm$ 5      | 64 $\pm$ 4      | 64 $\pm$ 7      | 64 $\pm$ 5      |
| ALT (IU/L)                               | 25 $\pm$ 1      | 28 $\pm$ 5      | 26 $\pm$ 3      | 29 $\pm$ 5      |
| ALP (IU/L)                               | 504 $\pm$ 152   | 487 $\pm$ 170   | 511 $\pm$ 141   | 566 $\pm$ 181   |
| T-CHO (mg/dL)                            | 85 $\pm$ 12     | 68 $\pm$ 13     | 64 $\pm$ 5      | 88 $\pm$ 20     |
| TG (mg/dL)                               | 28 $\pm$ 17     | 24 $\pm$ 15     | 17 $\pm$ 6      | 19 $\pm$ 10     |
| PL (mg/dL)                               | 143 $\pm$ 19    | 121 $\pm$ 18    | 117 $\pm$ 11    | 137 $\pm$ 26    |
| TP (g/dL)                                | 6.1 $\pm$ 0.2   | 6.0 $\pm$ 0.3   | 5.9 $\pm$ 0.2   | 5.8 $\pm$ 0.2   |
| ALB (g/dL)                               | 3.6 $\pm$ 0.1   | 3.6 $\pm$ 0.2   | 3.5 $\pm$ 0.2   | 3.4 $\pm$ 0.1   |
| A/G                                      | 1.4 $\pm$ 0.1   | 1.5 $\pm$ 0.1   | 1.4 $\pm$ 0.0   | 1.4 $\pm$ 0.1   |

RBC: red blood cell, HGB: hemoglobin, HCT: hematocrit, MCV: mean corpuscular volume, MCH: mean corpuscular hemoglobin, MCHC: mean corpuscular hemoglobin concentration, Retic: reticulocyte, PLT: platelet, WBC: white blood cell, Lymph: lymphocyte, NEUT: neutrophil, EOS: eosinophil, MONO: monocyte, LUC: large unstained cell, AST: aspartate aminotransferase, ALT: alanine aminotransferase, T-CHO: total cholesterol, TG: triglyceride, PL: phospholipid, TP: total protein, ALB: albumin, A/G: albumin/globulin



**Supplementary Table 6-1. List of the upregulated or downregulated genes by treatment with RK-701.**

| Regulation: Up |                                                                            |                |               |
|----------------|----------------------------------------------------------------------------|----------------|---------------|
| Symbol         | Description                                                                | log2FoldChange | LOG10(qvalue) |
| TSPO2          | translocator protein 2(TSPO2)                                              | 1.00           | 4.13          |
| ZNF440         | zinc finger protein 440(ZNF440)                                            | 1.02           | 2.24          |
| CCDC71L        | coiled-coil domain containing 71 like(CCDC71L)                             | 1.02           | 13.51         |
| ULBP1          | UL16 binding protein 1(ULBP1)                                              | 1.02           | 18.78         |
| RNASE1         | ribonuclease A family member 1, pancreatic(RNASE1)                         | 1.02           | 1.61          |
| QSOX1          | quiescin sulphydryl oxidase 1(QSOX1)                                       | 1.03           | 11.93         |
| RAET1K         | retinoic acid early transcript 1K pseudogene(RAET1K)                       | 1.03           | 1.47          |
| SAMD9          | sterile alpha motif domain containing 9(SAMD9)                             | 1.04           | 17.55         |
| SMIM14         | small integral membrane protein 14(SMIM14)                                 | 1.06           | 2.66          |
| C10orf25       | ZNF22 antisense RNA 1(ZNF22-AS1)                                           | 1.06           | 3.17          |
| RNLS           | renalase, FAD dependent amine oxidase(RNLS)                                | 1.06           | 1.90          |
| BSN            | bassoon presynaptic cytomatrix protein(BSN)                                | 1.07           | 1.74          |
| FCGR2A         | Fc gamma receptor IIa(FCGR2A)                                              | 1.07           | 2.92          |
| CR1L           | complement C3b/C4b receptor 1 like(CR1L)                                   | 1.07           | 3.46          |
| CD53           | CD53 molecule(CD53)                                                        | 1.08           | 56.35         |
| RP11-10L12.4   |                                                                            | 1.08           | 1.32          |
| AC006116.17    |                                                                            | 1.11           | 7.90          |
| PASD1          | PAS domain containing repressor 1(PASD1)                                   | 1.11           | 3.86          |
| FCGR2C         |                                                                            | 1.15           | 3.17          |
| GPR65          | G protein-coupled receptor 65(GPR65)                                       | 1.15           | 1.55          |
| RP11-420K14.1  |                                                                            | 1.18           | 25.55         |
| FRY            | FRY microtubule binding protein(FRY)                                       | 1.18           | 4.91          |
| CD84           | CD84 molecule(CD84)                                                        | 1.19           | 25.57         |
| CPS1           | carbamoyl-phosphate synthase 1(CPS1)                                       | 1.20           | 12.28         |
| CAPS2          | calcyphosine 2(CAPS2)                                                      | 1.21           | 4.37          |
| FMO4           | flavin containing dimethylaniline monooxygenase 4(FMO4)                    | 1.23           | 1.37          |
| HBG1           | hemoglobin subunit gamma 1(HBG1)                                           | 1.23           | 9.03          |
| TTN            | titin(TTN)                                                                 | 1.24           | 2.92          |
| PRG2           | proteoglycan 2, pro eosinophil major basic protein(PRG2)                   | 1.24           | 23.43         |
| SEPP1          | selenoprotein P(SELENOP)                                                   | 1.26           | 19.42         |
| SYP            | synaptophysin(SYP)                                                         | 1.26           | 4.83          |
| AKR1C1         | aldo-keto reductase family 1 member C1(AKR1C1)                             | 1.26           | 5.56          |
| AC006116.22    |                                                                            | 1.27           | 2.46          |
| TMEM74         | transmembrane protein 74(TMEM74)                                           | 1.29           | 1.36          |
| ATP1B1         | ATPase Na <sup>+</sup> /K <sup>+</sup> transporting subunit beta 1(ATP1B1) | 1.29           | 1.71          |
| DZIP3          | DAZ interacting zinc finger protein 3(DZIP3)                               | 1.30           | 29.50         |
| SLC8A3         | solute carrier family 8 member A3(SLC8A3)                                  | 1.33           | 2.72          |
| GS1-122H1.2    |                                                                            | 1.33           | 6.02          |
| EFCAB10        | EF-hand calcium binding domain 10(EFCAB10)                                 | 1.33           | 5.94          |
| CPA3           | carboxypeptidase A3(CPA3)                                                  | 1.33           | 2.94          |
| TMEM144        | transmembrane protein 144(TMEM144)                                         | 1.34           | 5.19          |
| TMEM133        |                                                                            | 1.37           | 4.87          |
| HSPA7          | heat shock protein family A (Hsp70) member 7 (pseudogene)(HSPA7)           | 1.37           | 7.04          |
| RHD            | Rh blood group D antigen(RHD)                                              | 1.38           | 5.17          |
| TRIM10         | tripartite motif containing 10(TRIM10)                                     | 1.38           | 23.67         |
| XAF1           | XIAP associated factor 1(XAF1)                                             | 1.39           | 2.71          |
| RP11-38M8.1    | uncharacterized LOC105375519(LOC105375519)                                 | 1.39           | 1.50          |
| ZNF365         | zinc finger protein 365(ZNF365)                                            | 1.41           | 3.41          |
| RP11-538D16.2  |                                                                            | 1.42           | 2.81          |
| KRT79          | keratin 79(KRT79)                                                          | 1.42           | 2.79          |
| PTPRC          | protein tyrosine phosphatase receptor type C(PTPRC)                        | 1.44           | 22.86         |
| FPR3           | formyl peptide receptor 3(FPR3)                                            | 1.45           | 5.06          |
| MYO5B          | myosin VB(MYO5B)                                                           | 1.45           | 9.15          |
| RP11-284F21.10 |                                                                            | 1.49           | 1.72          |
| UTRN           | utrophin(UTRN)                                                             | 1.50           | 15.52         |
| NID1           | nidogen 1(NID1)                                                            | 1.52           | 2.31          |
| ARHGAP25       | Rho GTPase activating protein 25(ARHGAP25)                                 | 1.52           | 2.49          |
| ATP8A2         | ATPase phospholipid transporting 8A2(ATP8A2)                               | 1.55           | 1.40          |
| IGSF3          | immunoglobulin superfamily member 3(IGSF3)                                 | 1.56           | 3.06          |
| CDC42EP3       | CDC42 effector protein 3(CDC42EP3)                                         | 1.58           | 8.64          |
| HLA-DMA        | major histocompatibility complex, class II, DM alpha(HLA-DMA)              | 1.58           | 3.56          |
| ALDH1A1        | aldehyde dehydrogenase 1 family member A1(ALDH1A1)                         | 1.58           | 12.98         |
| HEPACAM2       | HEPACAM family member 2(HEPACAM2)                                          | 1.60           | 8.09          |
| CCDC64         | BICD family like cargo adaptor 1(BICDL1)                                   | 1.60           | 3.45          |
| DPYD           | dihydropyrimidine dehydrogenase(DPYD)                                      | 1.61           | 2.02          |
| NXF3           | nuclear RNA export factor 3(NXF3)                                          | 1.63           | 17.99         |

**Supplementary Table 6-2. List of the upregulated or downregulated genes by treatment with RK-701.**

|               |                                                                      |      |       |
|---------------|----------------------------------------------------------------------|------|-------|
| DISP2         | dispatched RND transporter family member 2(DISP2)                    | 1.66 | 10.79 |
| LINC01033     | long intergenic non-protein coding RNA 1033(LINC01033)               | 1.66 | 4.97  |
| FMN1          | formin 1(FMN1)                                                       | 1.67 | 9.10  |
| RUNX2         | RUNX family transcription factor 2(RUNX2)                            | 1.68 | 1.68  |
| AKR1C2        | aldo-keto reductase family 1 member C2(AKR1C2)                       | 1.68 | 8.64  |
| CTD-2643I7.1  | beta globin locus transcript 3(BGLT3)                                | 1.72 | 3.84  |
| HBG2          | hemoglobin subunit gamma 2(HBG2)                                     | 1.73 | 56.78 |
| ADAMTS19      | ADAM metalloproteinase with thrombospondin type 1 motif 19(ADAMTS19) | 1.73 | 3.39  |
| MEGF6         | multiple EGF like domains 6(MEGF6)                                   | 1.74 | 10.62 |
| ARHGAP42      | Rho GTPase activating protein 42(ARHGAP42)                           | 1.75 | 43.03 |
| PTH2R         | parathyroid hormone 2 receptor(PTH2R)                                | 1.75 | 48.29 |
| PDE4D         | phosphodiesterase 4D(PDE4D)                                          | 1.76 | 8.07  |
| EGFL6         | EGF like domain multiple 6(EGFL6)                                    | 1.76 | 7.05  |
| CASP4         | caspase 4(CASP4)                                                     | 1.78 | 26.02 |
| TMPRSS11F     | transmembrane serine protease 11F(TMPRSS11F)                         | 1.79 | 1.43  |
| PARK2         | parkin RBR E3 ubiquitin protein ligase(PRKN)                         | 1.83 | 12.43 |
| C1orf115      | chromosome 1 open reading frame 115(C1orf115)                        | 1.85 | 12.66 |
| CRISP2        | cysteine rich secretory protein 2(CRISP2)                            | 1.86 | 12.07 |
| LRRC16B       | capping protein regulator and myosin 1 linker 3(CARMIL3)             | 1.87 | 2.84  |
| FAM46D        | terminal nucleotidyltransferase 5D(TENT5D)                           | 1.89 | 1.58  |
| SCAMP5        | secretory carrier membrane protein 5(SCAMP5)                         | 1.97 | 2.39  |
| RAB27B        | RAB27B, member RAS oncogene family(RAB27B)                           | 2.01 | 81.55 |
| RP11-495P10.8 |                                                                      | 2.01 | 11.73 |
| RP11-79H23.3  |                                                                      | 2.01 | 1.65  |
| SP140L        | SP140 nuclear body protein like(SP140L)                              | 2.02 | 7.52  |
| LINC00570     | long intergenic non-protein coding RNA 570(LINC00570)                | 2.02 | 6.02  |
| GCSAM         | germinal center associated signaling and motility(GCSAM)             | 2.02 | 2.66  |
| MACC1         | MET transcriptional regulator MACC1(MACC1)                           | 2.03 | 23.88 |
| PIFO          | primary cilia formation(PIFO)                                        | 2.04 | 1.89  |
| RUNDC3A       | RUN domain containing 3A(RUNDC3A)                                    | 2.04 | 4.00  |
| LTF           | lactotransferrin(LTF)                                                | 2.05 | 2.31  |
| AGMO          | alkylglycerol monooxygenase(AGMO)                                    | 2.07 | 1.65  |
| SCIN          | scinderin(SCIN)                                                      | 2.08 | 83.47 |
| KIF4B         | kinesin family member 4B(KIF4B)                                      | 2.10 | 17.21 |
| CARD16        | caspase recruitment domain family member 16(CARD16)                  | 2.12 | 5.39  |
| FCGR2B        | Fc gamma receptor IIb(FCGR2B)                                        | 2.14 | 1.80  |
| TRAF3IP3      | TRAF3 interacting protein 3(TRAF3IP3)                                | 2.15 | 3.77  |
| RP11-180K7.1  |                                                                      | 2.16 | 4.03  |
| HBE1          | hemoglobin subunit epsilon 1(HBE1)                                   | 2.16 | 4.40  |
| SIGLEC22P     |                                                                      | 2.27 | 2.62  |
| SYN1          | synapsin I(SYN1)                                                     | 2.29 | 22.41 |
| ABLIM3        | actin binding LIM protein family member 3(ABLIM3)                    | 2.35 | 2.99  |
| TENM1         | teneurin transmembrane protein 1(TENM1)                              | 2.38 | 5.69  |
| FCER1A        | Fc epsilon receptor 1a(FCER1A)                                       | 2.40 | 3.18  |
| PLXNA4        | plexin A4(PLXNA4)                                                    | 2.45 | 5.01  |
| HEPH          | hephaestin(HEPH)                                                     | 2.45 | 2.89  |
| RP11-354E11.2 | uncharacterized LOC101928834(LOC101928834)                           | 2.48 | 4.85  |
| ABI3BP        | ABI family member 3 binding protein(ABI3BP)                          | 2.52 | 3.05  |
| CSMD2         | CUB and Sushi multiple domains 2(CSMD2)                              | 2.55 | 9.82  |
| RP11-495P10.7 |                                                                      | 2.63 | 26.31 |
| SPRR2F        | small proline rich protein 2F(SPRR2F)                                | 2.63 | 11.68 |
| GAPT          | GRB2 binding adaptor protein, transmembrane(GAPT)                    | 2.63 | 9.66  |
| RP1-80N2.2    |                                                                      | 2.66 | 2.20  |
| LINC01028     | long intergenic non-protein coding RNA 1028(LINC01028)               | 2.68 | 1.42  |
| IL18RAP       | interleukin 18 receptor accessory protein(IL18RAP)                   | 2.70 | 38.72 |
| AC008069.1    |                                                                      | 2.72 | 4.12  |
| RP11-553A10.1 |                                                                      | 2.79 | 4.42  |
| RP11-618I10.1 |                                                                      | 2.82 | 2.17  |
| COL4A4        | collagen type IV alpha 4 chain(COL4A4)                               | 2.85 | 2.28  |
| NPM1P50       | nucleophosmin 1 pseudogene 50(NPM1P50)                               | 2.88 | 1.37  |
| NR5A2         | nuclear receptor subfamily 5 group A member 2(NR5A2)                 | 2.89 | 18.86 |
| KCNT2         | potassium sodium-activated channel subfamily T member 2(KCNT2)       | 2.93 | 22.19 |
| IFI16         | interferon gamma inducible protein 16(IFI16)                         | 3.05 | 28.76 |
| RP11-63D14.1  |                                                                      | 3.06 | 9.66  |
| HCLS1         | hematopoietic cell-specific Lyn substrate 1(HCLS1)                   | 3.08 | 32.20 |
| TBXAS1        | thromboxane A synthase 1(TBXAS1)                                     | 3.09 | 10.03 |
| NCKAP5        | NCK associated protein 5(NCKAP5)                                     | 3.12 | 26.20 |
| RP3-460G2.2   |                                                                      | 3.14 | 2.00  |

**Supplementary Table 6-3. List of the upregulated or downregulated genes by treatment with RK-701.**

|                |                                                                |     |      |        |
|----------------|----------------------------------------------------------------|-----|------|--------|
| SH2D4B         | SH2 domain containing 4B(SH2D4B)                               |     | 3.15 | 1.34   |
| FYB            | FYN binding protein 1(FYB1)                                    |     | 3.16 | 4.73   |
| AF127936.3     |                                                                |     | 3.20 | 34.86  |
| OR2AT4         | olfactory receptor family 2 subfamily AT member 4(OR2AT4)      |     | 3.23 | 2.94   |
| LAMB3          | laminin subunit beta 3(LAMB3)                                  |     | 3.33 | 22.70  |
| RP11-34P13.7   |                                                                |     | 3.39 | 1.88   |
| MTUS1          | microtubule associated scaffold protein 1(MTUS1)               |     | 3.44 | 2.91   |
| LINC00426      | long intergenic non-protein coding RNA 426(LINC00426)          |     | 3.54 | 2.22   |
| CASP1          | caspase 1(CASP1)                                               |     | 3.55 | 4.48   |
| RNASE6         | ribonuclease A family member k6(RNASE6)                        |     | 3.70 | 1.55   |
| CHIAP3         |                                                                |     | 3.70 | 1.55   |
| RP11-208K4.1   |                                                                |     | 3.72 | 1.66   |
| MS4A2          | membrane spanning 4-domains A2(MS4A2)                          |     | 3.76 | 39.84  |
| AC064834.1     |                                                                |     | 3.77 | 6.96   |
| ZNF827         | zinc finger protein 827(ZNF827)                                |     | 3.83 | 6.02   |
| CTC-546K23.1   |                                                                |     | 3.86 | 6.27   |
| AC011891.5     |                                                                |     | 3.88 | 2.00   |
| AC092642.1     |                                                                |     | 3.88 | 10.97  |
| NECAB1         | N-terminal EF-hand calcium binding protein 1(NECAB1)           |     | 4.01 | 2.39   |
| RP11-861A13.4  | long intergenic non-protein coding RNA 1215(LINC01215)         |     | 4.10 | 6.22   |
| SMPD3          | sphingomyelin phosphodiesterase 3(SMPD3)                       |     | 4.11 | 5.05   |
| AC003090.1     | long intergenic non-protein coding RNA 3007(LINC03007)         |     | 4.12 | 2.65   |
| AF127936.5     |                                                                |     | 4.32 | 1.39   |
| LINC01088      | long intergenic non-protein coding RNA 1088(LINC01088)         |     | 4.39 | 5.84   |
| RP11-1112C15.1 | long intergenic non-protein coding RNA 1602(LINC01602)         |     | 4.49 | 1.60   |
| GLRA3          | glycine receptor alpha 3(GLRA3)                                |     | 4.49 | 1.60   |
| NLRP11         | NLR family pyrin domain containing 11(NLRP11)                  |     | 4.50 | 3.35   |
| SPRR2E         | small proline rich protein 2E(SPRR2E)                          |     | 4.54 | 1.71   |
| TDRG1          | testis development related 1(TDRG1)                            |     | 4.60 | 1.63   |
| C12orf79       | long intergenic non-protein coding RNA 1619(LINC01619)         |     | 4.62 | 2.80   |
| PART1          | prostate androgen-regulated transcript 1(PART1)                |     | 4.62 | 1.85   |
| DDIT4L         | DNA damage inducible transcript 4 like(DDIT4L)                 |     | 4.74 | 2.25   |
| CD300C         | CD300c molecule(CD300C)                                        |     | 4.82 | 2.36   |
| CD2            | CD2 molecule(CD2)                                              |     | 5.01 | 2.89   |
| CTD-2215E18.1  |                                                                |     | 5.06 | 2.48   |
| NEBL           | nebulette(NEBL)                                                |     | 5.41 | 9.48   |
| PRKG2          | protein kinase cGMP-dependent 2(PRKG2)                         |     | 5.55 | 5.01   |
| GABRG1         | gamma-aminobutyric acid type A receptor subunit gamma1(GABRG1) |     | 5.62 | 4.71   |
| RP11-11N9.4    | uncharacterized LOC105379362(LOC105379362)                     |     | 5.87 | 5.17   |
| RP11-704M14.1  | uncharacterized LOC105377267(LOC105377267)                     |     | 6.22 | 7.47   |
| RYR2           | ryanodine receptor 2(RYR2)                                     |     | 7.26 | 183.22 |
| MYO16          | myosin XVI(MYO16)                                              | Inf |      | 10.81  |
| SEMA3C         | semaphorin 3C(SEMA3C)                                          | Inf |      | 1.63   |
| LRP2           | LDL receptor related protein 2(LRP2)                           | Inf |      | 4.85   |
| SGCG           | sarcoglycan gamma(SGCG)                                        | Inf |      | 1.64   |
| DKK1           | dickkopf WNT signaling pathway inhibitor 1(DKK1)               | Inf |      | 1.61   |
| TCN1           | transcobalamin 1(TCN1)                                         | Inf |      | 5.59   |
| ABCA8          | ATP binding cassette subfamily A member 8(ABCA8)               | Inf |      | 1.50   |
| GPA33          | glycoprotein A33(GPA33)                                        | Inf |      | 1.37   |
| TMEM140        | transmembrane protein 140(TMEM140)                             | Inf |      | 2.90   |
| PTPN14         | protein tyrosine phosphatase non-receptor type 14(PTPN14)      | Inf |      | 5.13   |
| TMPRSS15       | transmembrane serine protease 15(TMPRSS15)                     | Inf |      | 1.64   |
| INHBB          | inhibin subunit beta B(INHBB)                                  | Inf |      | 1.90   |
| CCL23          |                                                                | Inf |      | 1.62   |
| C15orf27       | transmembrane protein 266(TMEM266)                             | Inf |      | 1.64   |
| UGT2B11        | UDP glucuronosyltransferase family 2 member B11(UGT2B11)       | Inf |      | 3.77   |
| XX-FW81066F1.2 |                                                                | Inf |      | 1.63   |
| RP5-937E21.8   |                                                                | Inf |      | 8.42   |
| AC016730.1     |                                                                | Inf |      | 1.50   |
| AP000431.2     |                                                                | Inf |      | 2.05   |
| AC027119.1     |                                                                | Inf |      | 1.85   |
| RP11-462G2.1   |                                                                | Inf |      | 2.76   |
| LINC00504      | long intergenic non-protein coding RNA 504(LINC00504)          | Inf |      | 19.54  |
| ADAMTS19-AS1   | ADAMTS19 antisense RNA 1(ADAMTS19-AS1)                         | Inf |      | 1.64   |
| RP11-265F19.1  |                                                                | Inf |      | 3.06   |
| CTD-2353F22.1  | uncharacterized LOC107986412(LOC107986412)                     | Inf |      | 2.59   |
| RP11-466P24.6  |                                                                | Inf |      | 2.30   |
| RP11-708B6.2   |                                                                | Inf |      | 1.64   |
| RP11-284F21.8  |                                                                | Inf |      | 1.64   |
| EMR4P          |                                                                | Inf |      | 2.05   |

## Supplementary Table 6-4 List of the upregulated or downregulated genes by treatment with RK-701.

| Regulation: Down |                                                         |                |               |  |
|------------------|---------------------------------------------------------|----------------|---------------|--|
| Symbol           | Name                                                    | log2FoldChange | LOG10(qvalue) |  |
| TMEM176A         | transmembrane protein 176A(TMEM176A)                    | -1.36          | 7.63          |  |
| MLXIPL           | MLX interacting protein like(MLXIPL)                    | -1.34          | 5.02          |  |
| ZNF582           | zinc finger protein 582(ZNF582)                         | -1.08          | 1.79          |  |
| CELSR1           | cadherin EGF LAG seven-pass G-type receptor 1(CELSR1)   | -1.75          | 9.97          |  |
| ZNF586           | zinc finger protein 586(ZNF586)                         | -2.32          | 6.90          |  |
| CERS4            | ceramide synthase 4(CERS4)                              | -1.11          | 5.39          |  |
| NINL             | ninein like(NINL)                                       | -1.21          | 1.42          |  |
| RNF125           | ring finger protein 125(RNF125)                         | -1.13          | 1.57          |  |
| NDRG4            | NDRG family member 4(NDRG4)                             | -1.15          | 2.64          |  |
| SLC5A5           | solute carrier family 5 member 5(SLC5A5)                | -1.08          | 1.88          |  |
| TMEM176B         | transmembrane protein 176B(TMEM176B)                    | -1.12          | 10.15         |  |
| AKNA             | AT-hook transcription factor(AKNA)                      | -1.59          | 1.79          |  |
| MYRF             | myelin regulatory factor(MYRF)                          | -1.57          | 5.49          |  |
| PLPPR3           | phospholipid phosphatase related 3(PLPPR3)              | -2.88          | 5.95          |  |
| TNNI3            | troponin I3, cardiac type(TNNI3)                        | -1.48          | 2.67          |  |
| HBZ              | hemoglobin subunit zeta(HBZ)                            | -1.67          | 8.63          |  |
| ZNF426           | zinc finger protein 426(ZNF426)                         | -1.19          | 7.15          |  |
| GFPT2            | glutamine-fructose-6-phosphate transaminase 2(GFPT2)    | -1.56          | 2.46          |  |
| ZNF304           | zinc finger protein 304(ZNF304)                         | -1.07          | 7.21          |  |
| HSPA12B          | heat shock protein family A (Hsp70) member 12B(HSPA12B) | -1.88          | 15.49         |  |
| DYSF             | dysferlin(DYSF)                                         | -1.18          | 2.73          |  |
| ZFP14            | ZFP14 zinc finger protein(ZFP14)                        | -2.84          | 1.69          |  |
| CILP2            | cartilage intermediate layer protein 2(CILP2)           | -1.32          | 4.99          |  |
| ZNF761           | zinc finger protein 761(ZNF761)                         | -1.03          | 4.09          |  |
| COX6B2           | cytochrome c oxidase subunit 6B2(COX6B2)                | -1.08          | 2.17          |  |
| FGFR4            | fibroblast growth factor receptor 4(FGFR4)              | -1.24          | 1.98          |  |
| PTGER1           | prostaglandin E receptor 1(PTGER1)                      | -2.42          | 1.34          |  |
| AMN              | amnion associated transmembrane protein(AMN)            | -2.62          | 3.20          |  |
| SLC38A8          | solute carrier family 38 member 8(SLC38A8)              | -1.89          | 8.16          |  |
| ZNF229           |                                                         | -2.67          | 3.71          |  |
| PLIN4            | perilipin 4(PLIN4)                                      | -1.67          | 3.37          |  |
| KLK1             | kallikrein 1(KLK1)                                      | -1.11          | 2.59          |  |
| TMC8             | transmembrane channel like 8(TMC8)                      | -1.17          | 1.68          |  |
| ZNF160           | zinc finger protein 160(ZNF160)                         | -1.32          | 4.00          |  |
| SPTBN2           | spectrin beta, non-erythrocytic 2(SPTBN2)               | -1.07          | 6.17          |  |
| LCN15            | lipocalin 15(LCN15)                                     | -1.13          | 1.48          |  |
| STAP2            | signal transducing adaptor family member 2(STAP2)       | -1.27          | 2.16          |  |
| HKR1             | zinc finger protein 875(ZNF875)                         | -1.40          | 1.42          |  |
| ZNF320           | zinc finger protein 320(ZNF320)                         | -1.00          | 2.28          |  |
| ANO9             | anoctamin 9(ANO9)                                       | -2.05          | 4.78          |  |
| PRSS57           | serine protease 57(PRSS57)                              | -1.33          | 3.89          |  |
| ZNF559           | zinc finger protein 559(ZNF559)                         | -1.49          | 9.83          |  |
| ZNF548           | zinc finger protein 548(ZNF548)                         | -1.14          | 2.43          |  |
| SH2D5            | SH2 domain containing 5(SH2D5)                          | -1.73          | 2.01          |  |
| ZNF569           | zinc finger protein 569(ZNF569)                         | -1.84          | 3.12          |  |
| ZNF136           | zinc finger protein 136(ZNF136)                         | -1.86          | 1.52          |  |
| ZNF441           | zinc finger protein 441(ZNF441)                         | -1.08          | 3.47          |  |
| ZNF420           | zinc finger protein 420(ZNF420)                         | -1.09          | 3.99          |  |
| ZNF772           | zinc finger protein 772(ZNF772)                         | -1.74          | 5.49          |  |
| CFD              | complement factor D(CFD)                                | -1.10          | 2.92          |  |
| ZNF813           | zinc finger protein 813(ZNF813)                         | -1.66          | 2.90          |  |
| ZNF583           | zinc finger protein 583(ZNF583)                         | -1.06          | 3.67          |  |
| ZNF808           | zinc finger protein 808(ZNF808)                         | -1.02          | 2.43          |  |
| ZNF525           | zinc finger protein 525(ZNF525)                         | -1.02          | 6.19          |  |
| SOX18            | SRY-box transcription factor 18(SOX18)                  | -3.14          | 2.57          |  |
| ZNF814           | zinc finger protein 814(ZNF814)                         | -1.05          | 3.00          |  |
| ZNF551           | zinc finger protein 551(ZNF551)                         | -1.64          | 6.12          |  |
| ZNF611           | zinc finger protein 611(ZNF611)                         | -1.71          | 4.80          |  |
| ZNF134           | zinc finger protein 134(ZNF134)                         | -1.62          | 6.71          |  |
| ZNF845           | zinc finger protein 845(ZNF845)                         | -1.32          | 9.54          |  |
| CTD-2006C1.2     | ZNF433 and ZNF878 antisense RNA 1(ZNF433-AS1)           | -1.10          | 2.05          |  |
| CERS1            | ceramide synthase 1(CERS1)                              | -1.59          | 4.44          |  |
| RP3-395M20.8     |                                                         | -1.10          | 1.47          |  |
| ZNF10            | zinc finger protein 10(ZNF10)                           | -1.13          | 7.05          |  |
| ZNF350           | zinc finger protein 350(ZNF350)                         | -1.14          | 3.58          |  |

**Supplementary Table 7. List of the expression level of genes related to globin switching.**

|                             | Symbol       | Description                                                          | FoldChange  |               |
|-----------------------------|--------------|----------------------------------------------------------------------|-------------|---------------|
|                             |              |                                                                      | RK-701      | shG9a         |
| Globin                      | HBB          | hemoglobin beta                                                      | 1.13 ± 0.05 | 1.05 ± 0.18   |
|                             | HBBP1        | hemoglobin beta pseudogene 1                                         | 0.99 ± 0.02 | 2.48 ± 1.76   |
|                             | HBD          | hemoglobin delta                                                     | 1.01 ± 0.03 | 1.10 ± 0.59   |
|                             | HBE1         | hemoglobin epsilon 1                                                 | 4.70 ± 0.71 | 8.19 ± 3.52   |
|                             | HBG1         | hemoglobin gamma A                                                   | 2.51 ± 0.58 | 97.81 ± 94.48 |
|                             | HBG2         | hemoglobin gamma G                                                   | 3.33 ± 0.28 | 46.70 ± 28.27 |
|                             | HBA1         | hemoglobin alpha 1                                                   | 1.15 ± 0.13 | 1.89 ± 0.46   |
|                             | HBA2         | hemoglobin alpha 2                                                   | 1.19 ± 0.04 | 2.00 ± 0.47   |
|                             | HBM          | hemoglobin mu                                                        | 0.96 ± 0.04 | 1.73 ± 0.16   |
|                             | HBQ1         | hemoglobin theta 1                                                   | 1.09 ± 0.05 | 1.06 ± 0.12   |
|                             | HBZ          | hemoglobin zeta                                                      | 0.31 ± 0.08 | 3.62 ± 1.19   |
|                             | HBZP1        | hemoglobin zeta pseudogene 1                                         | ---         | 11.56 ± 7.90  |
| Globin switching regulators | KLF1         | Kruppel-like factor 1 (erythroid)                                    | 1.02 ± 0.02 | 0.94 ± 0.02   |
|                             | ZBTB7A       | zinc finger and BTB domain containing 7A                             | 0.98 ± 0.04 | 0.95 ± 0.07   |
|                             | BCL11A       | B-cell CLL/lymphoma 11A (zinc finger protein)                        | 1.17 ± 0.09 | 0.80 ± 0.06   |
|                             | PPARGC1A     | peroxisome proliferator-activated receptor gamma coactivator 1 alpha | ---         | ---           |
|                             | MYB          | v-myb avian myeloblastosis viral oncogene homolog                    | 0.91 ± 0.01 | 0.73 ± 0.13   |
|                             | IKZF1        | IKAROS family zinc finger 1 (Ikaros)                                 | 1.07 ± 0.01 | 1.37 ± 0.16   |
|                             | SOX6         | SRY (sex determining region Y)-box 6                                 | 1.70 ± 0.07 | 1.87 ± 0.38   |
|                             | TAL1         | T-cell acute lymphocytic leukemia 1                                  | 1.12 ± 0.04 | 1.22 ± 0.12   |
|                             | GATA1        | GATA binding protein 1 (globin transcription factor 1)               | 0.97 ± 0.04 | 1.11 ± 0.12   |
|                             | LMO2         | LIM domain only 2 (rhombotin-like 1)                                 | 1.28 ± 0.04 | 1.84 ± 0.35   |
|                             | ZFPM1        | zinc finger protein FOG family member 1                              | 0.90 ± 0.09 | 0.95 ± 0.17   |
|                             | TCF3         | transcription factor 3                                               | 0.92 ± 0.02 | 1.11 ± 0.20   |
|                             | LIN28B       | lin-28 homolog B (C. elegans)                                        | 0.91 ± 0.07 | 5.28 ± 2.41   |
|                             | LDB1         | LIM domain binding 1                                                 | 1.03 ± 0.04 | 1.07 ± 0.08   |
|                             | DNMT1        | DNA (cytosine-5-)-methyltransferase 1                                | 0.97 ± 0.02 | 0.91 ± 0.10   |
|                             | KDM1A        | lysine (K)-specific demethylase 1A                                   | 0.88 ± 0.00 | 0.96 ± 0.13   |
|                             | CHD3         | chromodomain helicase DNA binding protein 3                          | 0.88 ± 0.02 | 1.05 ± 0.08   |
|                             | CHD4         | chromodomain helicase DNA binding protein 4                          | 1.00 ± 0.02 | 1.06 ± 0.05   |
|                             | MTA1         | metastasis associated 1                                              | 0.92 ± 0.04 | 1.25 ± 0.10   |
|                             | MTA2         | metastasis associated 1 family member 2                              | 0.95 ± 0.02 | 1.16 ± 0.04   |
|                             | HDAC1        | histone deacetylase 1                                                | 0.96 ± 0.03 | 0.93 ± 0.04   |
|                             | HDAC2        | histone deacetylase 2                                                | 0.95 ± 0.03 | 0.91 ± 0.23   |
|                             | MBD2         | methyl-CpG binding domain protein 2                                  | 1.03 ± 0.02 | 1.09 ± 0.06   |
|                             | MBD3         | methyl-CpG binding domain protein 3                                  | 0.96 ± 0.02 | 0.79 ± 0.14   |
|                             | RBBP4        | retinoblastoma binding protein 4                                     | 0.96 ± 0.03 | 0.81 ± 0.12   |
|                             | RBBP7        | retinoblastoma binding protein 7                                     | 0.98 ± 0.03 | 0.82 ± 0.02   |
|                             | GATAD2A      | GATA zinc finger domain containing 2A                                | 0.96 ± 0.03 | 0.93 ± 0.11   |
|                             | GATAD2B      | GATA zinc finger domain containing 2B                                | 1.02 ± 0.04 | 1.19 ± 0.12   |
|                             | NR2C1        | Nuclear Receptor Subfamily 2 Group C Member 1                        | 1.11 ± 0.04 | 0.58 ± 0.16   |
|                             | NR2C2        | Nuclear Receptor Subfamily 2 Group C Member 2                        | 0.97 ± 0.04 | 1.26 ± 0.26   |
|                             | BGLT3        | LncRNA-BGL3, Beta Globin Locus Transcript 3                          | 3.40 ± 0.34 | 10.02 ± 6.54  |
|                             | MIRLET7A1    | microRNA let-7a-1                                                    | ---         | 0.86 ± 1.79   |
|                             | MIR16-1      | microRNA 16-1                                                        | ---         | ---           |
| MIR26B                      | microRNA 26b | 0.96 ± 0.78                                                          | 5.02 ± 8.73 |               |
| MIR96                       | microRNA 96  | ---                                                                  | ---         |               |

**Supplementary Table 8-1. List of the overlapped genes in Supplementary Figure 7b and 9e.**  
The statistical test (adjp) was determined using multiple comparisons analysis, Benjamini-Hochberg adjusted FDR test of the default of AltAnalyze (Ver. 2.0).

| shG9a         |                                                                      | UP: 27     |           |
|---------------|----------------------------------------------------------------------|------------|-----------|
| Symbol        | Name                                                                 | FoldChange | adjp      |
| CCDC71L       | coiled-coil domain containing 71 like(CCDC71L)                       | 2.05       | 1.05.E-02 |
| ULBP1         | UL16 binding protein 1(ULBP1)                                        | 2.44       | 3.01.E-03 |
| FRY           | FRY microtubule binding protein(FRY)                                 | 2.77       | 4.29.E-02 |
| RAET1K        | retinoic acid early transcript 1K pseudogene(RAET1K)                 | 2.84       | 3.30.E-02 |
| IGSF3         | immunoglobulin superfamily member 3(IGSF3)                           | 2.88       | 5.14.E-03 |
| MYO5B         | myosin VB(MYO5B)                                                     | 3.00       | 3.83.E-02 |
| HCLS1         | hematopoietic cell-specific Lyn substrate 1(HCLS1)                   | 3.11       | 4.96.E-02 |
| EFCAB10       | EF-hand calcium binding domain 10(EFCAB10)                           | 3.79       | 4.38.E-02 |
| LTF           | lactotransferrin(LTF)                                                | 5.08       | 4.52.E-02 |
| HBE1          | hemoglobin subunit epsilon 1(HBE1)                                   | 5.62       | 2.63.E-03 |
| RUNDC3A       | RUN domain containing 3A(RUNDC3A)                                    | 5.82       | 1.58.E-03 |
| RP11-180K7.1  |                                                                      | 6.21       | 2.43.E-02 |
| CTD-2643I7.1  | beta globin locus transcript 3(BGLT3)                                | 6.73       | 1.65.E-02 |
| PRG2          | proteoglycan 2, pro eosinophil major basic protein(PRG2)             | 7.20       | 1.03.E-04 |
| LINC01033     | long intergenic non-protein coding RNA 1033(LINC01033)               | 7.33       | 1.43.E-02 |
| GS1-122H1.2   |                                                                      | 12.26      | 1.38.E-05 |
| TRAF3IP3      | TRAF3 interacting protein 3(TRAF3IP3)                                | 12.78      | 5.15.E-03 |
| RP11-538D16.2 |                                                                      | 15.31      | 2.81.E-05 |
| NR5A2         | nuclear receptor subfamily 5 group A member 2(NR5A2)                 | 16.62      | 1.31.E-03 |
| LAMB3         | laminin subunit beta 3(LAMB3)                                        | 18.68      | 7.19.E-06 |
| C1orf115      | chromosome 1 open reading frame 115(C1orf115)                        | 19.52      | 2.63.E-03 |
| ARHGAP25      | Rho GTPase activating protein 25(ARHGAP25)                           | 19.64      | 7.10.E-04 |
| PASD1         | PAS domain containing repressor 1(PASD1)                             | 19.98      | 4.99.E-04 |
| RAB27B        | RAB27B, member RAS oncogene family(RAB27B)                           | 29.08      | 1.42.E-06 |
| HBG2          | hemoglobin subunit gamma 2(HBG2)                                     | 34.29      | 3.27.E-03 |
| HBG1          | hemoglobin subunit gamma 1(HBG1)                                     | 58.47      | 1.06.E-03 |
| ADAMTS19      | ADAM metalloproteinase with thrombospondin type 1 motif 19(ADAMTS19) | 147.11     | 1.96.E-04 |

| shG9a        |                                                      | DOWN: 12   |           |
|--------------|------------------------------------------------------|------------|-----------|
| Symbol       | Name                                                 | FoldChange | adjp      |
| TMEM176B     | transmembrane protein 176B(TMEM176B)                 | -12.48     | 1.09.E-03 |
| TMEM176A     | transmembrane protein 176A(TMEM176A)                 | -9.90      | 2.89.E-03 |
| ZNF160       | zinc finger protein 160(ZNF160)                      | -6.21      | 3.86.E-02 |
| SPTBN2       | spectrin beta, non-erythrocytic 2(SPTBN2)            | -4.98      | 1.15.E-03 |
| GFPT2        | glutamine-fructose-6-phosphate transaminase 2(GFPT2) | -4.45      | 1.32.E-02 |
| LPFR3        | phospholipid phosphatase related 3(PLPPR3)           | -3.88      | 4.40.E-03 |
| PRSS57       | serine protease 57(PRSS57)                           | -3.60      | 2.45.E-02 |
| CFD          | complement factor D(CFD)                             | -2.66      | 8.95.E-04 |
| ZNF320       | zinc finger protein 320(ZNF320)                      | -2.59      | 1.77.E-03 |
| ZNF611       | zinc finger protein 611(ZNF611)                      | -2.57      | 4.00.E-03 |
| ZNF559       | zinc finger protein 559(ZNF559)                      | -2.34      | 4.65.E-03 |
| CTD-2006C1.2 | ZNF433 and ZNF878 antisense RNA 1(ZNF433-AS1)        | -2.24      | 1.75.E-02 |

**Supplementary Table 8-2. List of the overlapped genes in Supplementary Figure 7b and 9e.**

| BCL11A KO      |                                                        | UP: 35     |           |
|----------------|--------------------------------------------------------|------------|-----------|
| Symbol         | Name                                                   | FoldChange | adjp      |
| SAMD9          | sterile alpha motif domain containing 9(SAMD9)         | 2.44       | 1.77.E-02 |
| CCDC71L        | coiled-coil domain containing 71 like(CCDC71L)         | 2.57       | 3.35.E-03 |
| AC006116.22    |                                                        | 2.85       | 1.58.E-02 |
| AC006116.17    |                                                        | 2.94       | 2.00.E-03 |
| AKR1C1         | aldo-keto reductase family 1 member C1(AKR1C1)         | 3.09       | 1.42.E-02 |
| TSPO2          | translocator protein 2(TSPO2)                          | 3.46       | 5.42.E-03 |
| NECAB1         | N-terminal EF-hand calcium binding protein 1(NECAB1)   | 3.56       | 3.82.E-02 |
| HEPH           | hephaestin(HEPH)                                       | 3.98       | 1.72.E-02 |
| SYN1           | synapsin 1(SYN1)                                       | 4.36       | 9.47.E-04 |
| PASD1          | PAS domain containing repressor 1(PASD1)               | 4.74       | 3.63.E-03 |
| CASP4          | caspace 4(CASP4)                                       | 4.87       | 1.56.E-02 |
| ARHGAP25       | Rho GTPase activating protein 25(ARHGAP25)             | 5.18       | 6.44.E-03 |
| RP11-284F21.10 |                                                        | 5.25       | 2.81.E-02 |
| RP11-63D14.1   |                                                        | 6.64       | 1.33.E-03 |
| ZNF365         | zinc finger protein 365(ZNF365)                        | 8.01       | 6.10.E-03 |
| RHD            | Rh blood group D antigen(RHD)                          | 8.41       | 5.18.E-04 |
| CD300C         | CD300c molecule(CD300C)                                | 9.44       | 4.73.E-02 |
| CR1L           | complement C3b/C4b receptor 1 like(CR1L)               | 10.13      | 3.62.E-04 |
| LINC01033      | long intergenic non-protein coding RNA 1033(LINC01033) | 10.54      | 1.28.E-03 |
| LAMB3          | laminin subunit beta 3(LAMB3)                          | 10.79      | 7.19.E-03 |
| MACC1          | MET transcriptional regulator MACC1(MACC1)             | 11.84      | 2.61.E-04 |
| C12orf79       | long intergenic non-protein coding RNA 1619(LINC01619) | 15.06      | 1.35.E-02 |
| SPRR2F         | small proline rich protein 2F(SPRR2F)                  | 18.72      | 1.06.E-02 |
| KRT79          | keratin 79(KRT79)                                      | 21.05      | 5.00.E-03 |
| RUNX2          | RUNX family transcription factor 2(RUNX2)              | 25.64      | 1.19.E-03 |
| TRIM10         | tripartite motif containing 10(TRIM10)                 | 28.33      | 6.82.E-05 |
| CTD-2643I7.1   | beta globin locus transcript 3(BGLT3)                  | 35.82      | 1.61.E-03 |
| TMEM74         | transmembrane protein 74(TMEM74)                       | 37.86      | 2.27.E-04 |
| PTPRC          | protein tyrosine phosphatase receptor type C(PTPRC)    | 39.43      | 5.48.E-03 |
| HBG2           | hemoglobin subunit gamma 2(HBG2)                       | 44.78      | 1.35.E-04 |
| RUNDC3A        | RUN domain containing 3A(RUNDC3A)                      | 51.67      | 3.92.E-03 |
| ALDH1A1        | aldehyde dehydrogenase 1 family member A1(ALDH1A1)     | 194.70     | 1.73.E-03 |
| HBG1           | hemoglobin subunit gamma 1(HBG1)                       | 244.34     | 2.16.E-03 |
| HBE1           | hemoglobin subunit epsilon 1(HBE1)                     | 493.51     | 8.80.E-04 |
| ABLIM3         | actin binding LIM protein family member 3(ABLIM3)      | 1433.45    | 8.07.E-04 |

| BCL11A KO |                                            | DOWN: 5    |           |
|-----------|--------------------------------------------|------------|-----------|
| Symbol    | Name                                       | FoldChange | adjp      |
| PRSS57    | serine protease 57(PRSS57)                 | -63.54     | 2.23.E-04 |
| RNF125    | ring finger protein 125(RNF125)            | -4.82      | 3.34.E-03 |
| FGFR4     | fibroblast growth factor receptor 4(FGFR4) | -4.39      | 3.30.E-03 |
| DYSF      | dysferlin(DYSF)                            | -2.76      | 6.57.E-03 |
| ZNF559    | zinc finger protein 559(ZNF559)            | -2.01      | 1.36.E-02 |

**Supplementary Table 8-3. List of the overlapped genes in Supplementary Figure 7b and 9e.**

| ZBTB7A KO    |                                                                            | UP: 45     |           |
|--------------|----------------------------------------------------------------------------|------------|-----------|
| Symbol       | Name                                                                       | FoldChange | adjp      |
| CCDC71L      | coiled-coil domain containing 71 like(CCDC71L)                             | 2.20       | 6.26.E-03 |
| SYP          | synaptophysin(SYP)                                                         | 2.41       | 3.47.E-02 |
| ARHGAP25     | Rho GTPase activating protein 25(ARHGAP25)                                 | 2.64       | 2.38.E-02 |
| TSPO2        | translocator protein 2(TSPO2)                                              | 2.72       | 5.10.E-03 |
| RHD          | Rh blood group D antigen(RHD)                                              | 3.00       | 1.82.E-03 |
| KIF4B        | kinesin family member 4B(KIF4B)                                            | 3.00       | 6.99.E-03 |
| TRIM10       | tripartite motif containing 10(TRIM10)                                     | 3.03       | 4.74.E-03 |
| AKR1C1       | aldo-keto reductase family 1 member C1(AKR1C1)                             | 3.22       | 7.02.E-03 |
| EGFL6        | EGF like domain multiple 6(EGFL6)                                          | 3.31       | 4.53.E-03 |
| RP11-34P13.7 |                                                                            | 3.76       | 1.75.E-03 |
| CD84         | CD84 molecule(CD84)                                                        | 4.26       | 2.99.E-03 |
| PASD1        | PAS domain containing repressor 1(PASD1)                                   | 4.61       | 2.63.E-02 |
| FPR3         | formyl peptide receptor 3(FPR3)                                            | 4.64       | 4.66.E-03 |
| AC006116.22  |                                                                            | 4.75       | 1.76.E-03 |
| NECAB1       | N-terminal EF-hand calcium binding protein 1(NECAB1)                       | 5.33       | 6.17.E-03 |
| AC006116.17  |                                                                            | 5.63       | 1.92.E-04 |
| SPRR2F       | small proline rich protein 2F(SPRR2F)                                      | 5.85       | 4.83.E-02 |
| IFI16        | interferon gamma inducible protein 16(IFI16)                               | 6.96       | 6.25.E-03 |
| RP11-38M8.1  | uncharacterized LOC105375519(LOC105375519)                                 | 7.57       | 3.12.E-02 |
| SMIM14       | small integral membrane protein 14(SMIM14)                                 | 10.51      | 2.52.E-02 |
| ZNF365       | zinc finger protein 365(ZNF365)                                            | 10.64      | 2.32.E-03 |
| SYN1         | synapsin I(SYN1)                                                           | 11.28      | 2.33.E-04 |
| PRG2         | proteoglycan 2, pro eosinophil major basic protein(PRG2)                   | 12.02      | 6.04.E-04 |
| IL18RAP      | interleukin 18 receptor accessory protein(IL18RAP)                         | 14.63      | 4.40.E-03 |
| TMEM74       | transmembrane protein 74(TMEM74)                                           | 24.16      | 2.13.E-04 |
| ALDH1A1      | aldehyde dehydrogenase 1 family member A1(ALDH1A1)                         | 24.55      | 5.97.E-03 |
| LAMB3        | laminin subunit beta 3(LAMB3)                                              | 31.26      | 1.05.E-03 |
| HEPH         | hephaestin(HEPH)                                                           | 31.81      | 5.63.E-04 |
| CTD-264317.1 | beta globin locus transcript 3(BGLT3)                                      | 34.90      | 9.76.E-04 |
| RUNDC3A      | RUN domain containing 3A(RUNDC3A)                                          | 37.90      | 4.53.E-03 |
| HBG2         | hemoglobin subunit gamma 2(HBG2)                                           | 38.87      | 7.05.E-05 |
| OR2AT4       | olfactory receptor family 2 subfamily AT member 4(OR2AT4)                  | 40.60      | 3.25.E-03 |
| ATP1B1       | ATPase Na <sup>+</sup> /K <sup>+</sup> transporting subunit beta 1(ATP1B1) | 47.90      | 7.76.E-03 |
| NR5A2        | nuclear receptor subfamily 5 group A member 2(NR5A2)                       | 49.82      | 2.92.E-04 |
| CPA3         | carboxypeptidase A3(CPA3)                                                  | 113.86     | 6.16.E-06 |
| FMN1         | formin 1(FMN1)                                                             | 125.86     | 1.02.E-04 |
| HBE1         | hemoglobin subunit epsilon 1(HBE1)                                         | 126.25     | 1.39.E-03 |
| CSMD2        | CUB and Sushi multiple domains 2(CSMD2)                                    | 128.24     | 1.82.E-03 |
| KRT79        | keratin 79(KRT79)                                                          | 180.42     | 4.35.E-04 |
| HBG1         | hemoglobin subunit gamma 1(HBG1)                                           | 188.49     | 1.47.E-03 |
| MS4A2        | membrane spanning 4-domains A2(MS4A2)                                      | 254.03     | 2.89.E-03 |
| RAB27B       | RAB27B, member RAS oncogene family(RAB27B)                                 | 307.21     | 2.84.E-05 |
| RUNX2        | RUNX family transcription factor 2(RUNX2)                                  | 321.89     | 9.56.E-05 |
| ABLIM3       | actin binding LIM protein family member 3(ABLIM3)                          | 333.29     | 9.82.E-04 |
| PTPRC        | protein tyrosine phosphatase receptor type C(PTPRC)                        | 618.70     | 5.08.E-04 |

| ZBTB7A KO |                                            | DOWN: 5    |           |
|-----------|--------------------------------------------|------------|-----------|
| Symbol    | Name                                       | FoldChange | adjp      |
| PRSS57    | serine protease 57(PRSS57)                 | -8.28      | 6.63.E-04 |
| LPPR3     | phospholipid phosphatase related 3(PLPPR3) | -3.70      | 3.76.E-03 |
| ZNF772    | zinc finger protein 772(ZNF772)            | -3.68      | 7.23.E-03 |
| FGFR4     | fibroblast growth factor receptor 4(FGFR4) | -2.99      | 1.53.E-03 |
| DYSF      | dysferlin(DYSF)                            | -2.62      | 2.02.E-03 |



## Supplementary Table 9. Small molecule screening data.

| Category          | Parameter                                | Description                                                                                                                                |
|-------------------|------------------------------------------|--------------------------------------------------------------------------------------------------------------------------------------------|
| Assay             | Type of assay                            | <i>In vitro</i> fluorogenic assay                                                                                                          |
|                   | Target                                   | G9a                                                                                                                                        |
|                   | Primary measurement                      | Detection of the fluorescence intensity at $\lambda_{ex}$ 330 nm/ $\lambda_{em}$ 380 nm                                                    |
|                   | Key reagents                             | A recombinant mG9a protein, peptidyl-MCA substrate, and SAM                                                                                |
|                   | Assay protocol                           | The section in the methods                                                                                                                 |
|                   | Additional comments                      | None                                                                                                                                       |
| Library           | Library size                             | 141,117 compounds                                                                                                                          |
|                   | Library composition                      | Synthetic compounds with structural diversity                                                                                              |
|                   | Source                                   | Drug Discovery Initiative at The University of Tokyo (Tokyo, Japan)                                                                        |
|                   | Additional comments                      | None                                                                                                                                       |
| Screen            | Format                                   | 384-well plates                                                                                                                            |
|                   | Concentration(s) tested                  | 4 or 20 $\mu$ M, 1% DMSO                                                                                                                   |
|                   | Plate controls                           | High control: DMSO without SAM, Low control: DMSO                                                                                          |
|                   | Reagent/ compound dispensing system      | EDR-384UX (BioTec, Tokyo, Japan)<br>LD-02 single line dispenser (BioTec, Tokyo, Japan)                                                     |
|                   | Detection instrument and software        | Synergy H4 (BioTek, Winooski, USA)<br>Genedata Screener (Genedata, Basel, Switzerland)                                                     |
|                   | Assay validation/QC                      | Z'-factor was used for QC                                                                                                                  |
|                   | Correction factors                       | No specific correction was used                                                                                                            |
|                   | Normalization                            | Inhibition % = $100 \times (\text{Mean of low control} - \text{Sample well}) / (\text{Mean of low control} - \text{Mean of high control})$ |
|                   | Additional comments                      | None                                                                                                                                       |
| Post-HTS analysis | Hit criteria                             | Inhibition $\geq$ 30% at 20 $\mu$ M<br>Inhibition $\geq$ 15% at 4 $\mu$ M                                                                  |
|                   | Hit rate                                 | 0.07%                                                                                                                                      |
|                   | Additional assay(s)                      | AlphaLISA-based assay                                                                                                                      |
|                   | Confirmation of hit purity and structure | Compounds were repurchased (Enamine, Kiev, Ukraine) and resynthesized.                                                                     |
|                   | Additional comments                      | None                                                                                                                                       |

**Supplementary Table 10. Oligonucleotide primers used for quantitative PCR.**

|                     |                           | Sequence (5'-3')               |
|---------------------|---------------------------|--------------------------------|
| ChIP-qPCR           | HS4_F                     | TCTCCCACTCAGCAGCTATGAG         |
|                     | HS4_R                     | TGCTGGGCCTTGGAGTGA             |
|                     | HS3_F                     | GGGCTGGCCACCAGCTAT             |
|                     | HS3_R                     | CACCAACCTGACCTAACCACCTA        |
|                     | HS2_F                     | GGCTCAAGCACAGCAATGC            |
|                     | HS2_R                     | CATCACTCTAGGCTGAGAACATCTG      |
|                     | HS1_F                     | GCAATAGCAGGAGCATTCTGACT        |
|                     | HS1_R                     | GGACTATGCTGAGCTGTGATG          |
|                     | $\gamma$ pro_F            | CAAATATCTGTCTGAAACGGTCCCT      |
|                     | $\gamma$ pro_R            | TGCCTTGTCAAGGCTATTGGT          |
|                     | $\delta$ pro_F            | AACCCTGCTTATCTTAAACCAACCT      |
|                     | $\delta$ pro_R            | CTCTGCCCTGCCTTTTATGC           |
|                     | $\beta$ pro_F             | GAGGGTTTGAAGTCCAACCTCCTAA      |
|                     | $\beta$ pro_R             | CAGGGTGAGGTCTAAGTGATGACA       |
| ChIP-qPCR & RT-qPCR | BGLT3_F                   | AAGATAATCTTGGTTTTGCCTCAA       |
|                     | BGLT3_R                   | TCTACTTGATATAGTTGAGAGGCAGTTACC |
| RT-qPCR             | HBB_F                     | CAGTGCAGGCTGCCTATC             |
|                     | HBB_R                     | ATACTTGTGGGCCAGGGCAT           |
|                     | HBG1/2_F                  | TGGATGATCTCAAGGGCAC            |
|                     | HBG1/2_R                  | TCAGTGGTATCTGGAGGACA           |
|                     | BCL11A_F                  | ACAAACGGAAACAATGCAATGG         |
|                     | BCL11A_R                  | TTTCATCTCGATTGGTGAAGGG         |
|                     | ZBTB7A_F                  | GCTTGGGCCGGTTGAATGTA           |
|                     | ZBTB7A_R                  | GGCTGTGAAGTTACCGTCGG           |
|                     | GAPDH F                   | GCACCGTCAAGGCTGAGAAC           |
|                     | GAPDH R                   | TGGTGAAGACGCCAGTGGA            |
|                     | mouse Hba- $\alpha$ 1 F   | TCACTTTGATGTAAGCCACGG          |
|                     | mouse Hba- $\alpha$ 1 R   | TCAGAGCAGACAAGGCACC            |
|                     | mouse Hbb- $\epsilon$ y F | ACCCTCATCAATGGCCTGTG           |
|                     | mouse Hbb- $\epsilon$ y R | TGGCAGAAGCAGAGGACAAG           |
|                     | mouse Hbb- $\beta$ h1 F   | TGGATCCTGAGAACTTCAAGC          |
|                     | mouse Hbb- $\beta$ h1 R   | ATTGGCCACTCCAATCACC            |
|                     | mouse $\beta$ (maj/min) F | TTTAACGATGGCCTGAATCACTT        |
|                     | mouse $\beta$ (maj/min) R | CAGCACAATCACGATCATATTGC        |
|                     | mouse Gapdh F             | TGGTGAAGGTCGGTGTGAAC           |
|                     | mouse Gapdh R             | CCATGTAGTTGAGGTCAATGAAGG       |

**Supplementary Table 11. Oligonucleotide primers used for construction of plasmids.**

| vector                | gene            | Sequence (5'-3')                                             |
|-----------------------|-----------------|--------------------------------------------------------------|
| pCX4-pur              | BGLT3_F         | AGTGTGGTGGTACGGGAATCCCACAAAGGGTTTATATTGAGG                   |
|                       | BGLT3_R         | TTAACAATTGTTACCGCGCCGCTAAGGGGAAAACGGGTTTATTAC                |
| pIRES-3xFLAG          | BCL11A_F        | ATGACGATGACAAGGAATTCATGTCTCGCCGCAAGCAAG                      |
|                       | BCL11A_R        | CCCTCGAGCGGCCGCTCTAGATCAGAACTTAAGGGCTCTCG                    |
|                       | ZBTB7A_F        | ATGACGATGACAAGGAATTCATGGCCGGCGGCGTGGAC                       |
|                       | ZBTB7A_R        | CCCTCGAGCGGCCGCTCTAGATTAGGCGAGTCCGGCTGTG                     |
| pcDNA3.1(-)/myc-his B | CHD3_F          | AACGGGCCCTCTAGACTCGAGGCCACCATGGATAAGGATGACATTCCGGCTG         |
|                       | CHD3_R          | TAGTCCAGTGTGGTGAATTCGTTCAGAACCTTGTGCAGGAC                    |
|                       | CHD4_F          | AACGGGCCCTCTAGACTCGAGGCCACCATGGCGTCGGGCCTGGG                 |
|                       | CHD4_R          | TAGTCCAGTGTGGTGAATTCCTGTGCTGGGCTACCTG                        |
| pSUPER                | non-targeting_F | GATCCCCAAATCACAGAATCGTCGTATTCAAGAGATACGACGATTCTGTGATTTTTTTTA |
|                       | non-targeting_R | AGCTTAAAAAAATCACAGAATCGTCGTATCTCTTGAATACGACGATTCTGTGATTTGGG  |
|                       | G9a_F           | GATCCCCCTACTCTGTGGATGAGCGCTTCAAGAGAGCGCTCATCCACAGAGTAGTTTTTA |
|                       | G9a_R           | AGCTTAAAAACTACTCTGTGGATGAGCGCTCTCTTGAAGCGCTCATCCACAGAGTAGGGG |
|                       | BGLT3_F         | GATCCCCATCGATCTCTGCTCTTAATTCAAGAGATTAAGAGCAGAGATCGATTTTTTA   |
|                       | BGLT3_R         | AGCTTAAAAACATCGATCTCTGCTCTTAATCTCTTGAATTAAGAGCAGAGATCGATGGGG |

## Supplementary Table 12. MRM transitions for target peptides.

| protein                    | peptide         | precursor m/z | product m/z                         | collision energy (eV) |
|----------------------------|-----------------|---------------|-------------------------------------|-----------------------|
| Hemoglobin subunit gamma-1 | LHVDPENFK       | 549.8         | 251.2 (b2), 634.3 (y5), 749.3 (y6)  | 22                    |
|                            | LHVD[P*]ENFK    | 552.8         | 251.2 (b2), 640.3 (y5), 755.4 (y6)  | 22                    |
| Hemoglobin subunit beta    | LHVDPENFR       | 563.8         | 251.2 (b2), 662.3 (y5), 777.4 (y6)  | 23                    |
|                            | LHVD[P*]ENFR    | 566.8         | 251.2 (b2), 668.3 (y5), 783.4 (y6)  | 23                    |
| Hemoglobin subunit alpha   | FLASVSTVLTSK    | 626.9         | 735.4 (y7), 921.5 (y9), 992.6 (y10) | 25                    |
|                            | FLASVSTV[L*]TSK | 630.4         | 742.4 (y7), 928.5 (y9), 999.6 (y10) | 25                    |

[P\*] and [L\*] denote isotope-labeled amino acids.

## Supplementary Note

### Compound synthesis.

**General Procedure.** All chemicals were purchased from commercial suppliers TCI, Wako, and Sigma-Aldrich, and used as received unless otherwise specified. Melting points were measured using an OptiMelt MPA100 automated melting point system. Infrared (IR) spectra were recorded with a PerkinElmer Spectrum 100 spectrometer. Measurements of MS and high-resolution mass spectrometry (HRMS) were performed with a JEOL JMS-T100LP or Synapt G2 instrument (Waters) or Q Exactive (Thermo Fisher Scientific) mass spectrometer. Proton nuclear magnetic resonance ( $^1\text{H}$  NMR) spectra were measured with a JEOL JMN-ECA400 (400 MHz) or JEOL JMN-ECX400P (400 MHz) spectrometer. The chemical shifts are expressed in parts per million ( $\delta$  value) downfield from tetramethylsilane, using tetramethylsilane ( $\delta = 0$ ) and/or residual solvents such as chloroform ( $\delta = 7.26$ ) and dimethyl sulfoxide ( $\delta = 2.50$ ) as an internal standard. Splitting patterns are indicated as follows: s, singlet; d, doublet; t, triplet; q, quartet; m, multiplet; br; broad peak. Purity data were collected by an Agilent 1100 HPLC or U3000 (Thermo Fisher Scientific) with diode array detector. The column used was an RP-AQUA (50 mm  $\times$  2.1 mm ID, 2.6  $\mu\text{m}$ ; ChromaNik Technologies). The method is as follows: ESI+, flux of 0.5 mL/min, 5–95% MeCN in  $\text{H}_2\text{O}$  + 0.05% formic acid, total run time of 10 min ( $\lambda = 190\text{--}400$  nm). Column chromatography was carried out with silica gel 60 (Kanto Chemical) as an absorbent. Merck pre-coated thin-layer chromatography (TLC) plates (silica gel 60 F254, 0.25 mm, Art 5715) were used for the TLC analysis. All purities of final compounds were  $\geq 95.0\%$  and were measured using HPLC.

### Compound synthesis in Supplementary Fig. 15.

#### **Methyl (S)-2-(3-(methylthio)-1-(3,6,6-trimethyl-4-oxo-4,5,6,7-tetrahydro-1H-indole-2-carboxamido)propyl)-1H-benzo[d]imidazole-6-carboxylate (9).**

a) To a solution of Boc-Met-OH (1.0 g, 4.01 mmol), methyl 3,4-diaminobenzoate (733 mg, 4.41 mmol) and HOBT (150 mg, 4.81 mmol) in DMF (20 mL) were added DIEA (1.05 mL, 4.81 mmol) and EDCI-HCl (923 mg, 4.81 mmol) at  $0^\circ\text{C}$  under nitrogen atmosphere. The reaction mixture was stirred overnight at ambient temperature before being quenched with water. The aqueous layer was separated and extracted with ethyl acetate. Combined organic layer was washed with water and brine, dried over anhydrous sodium sulfate, and concentrated under reduced pressure after filtration. The residue was dissolved in acetic acid (12 mL) at ambient temperature under nitrogen atmosphere. The mixture was stirred at  $60^\circ\text{C}$  for 1 h, and then evaporated under reduced pressure before being quenched with saturated aqueous sodium bicarbonate. The aqueous layer was separated and extracted with ethyl acetate. Combined organic layer was washed with brine, dried over anhydrous sodium sulfate and concentrated under reduced pressure after filtration. The residue was purified by column chromatography on silica gel (ethyl acetate–hexane) to give methyl (S)-2-(1-((tert-butoxycarbonyl)amino)-3-(methylthio)propyl)-1H-benzo[d]imidazole-5-carboxylate (11.38 g, 91.0%) as a pale-red amorphous. LC–MS (ESI)  $m/z$ : 380 ( $\text{M} + \text{H}^+$ ).  $^1\text{H}$  NMR (500 MHz,  $\text{CDCl}_3$ ): 1.45 (9H, s), 2.09 (3H, s), 2.26–2.39 (1H, m), 2.43–2.55 (1H, m), 2.57–2.71 (2H, m), 3.94 (3H, s), 5.03–5.14 (1H, m), 5.42 (1H, s), 7.37–7.77 (1H, m), 7.97 (1H, m), 8.10–8.49 (1H, m), 10.57 (1H, brs).

b) To a solution of the above compound (1.6 g, 4.2 mmol) in ethyl acetate (10 mL) was added a solution of 4 M hydrogen chloride in ethyl acetate (10.5 mL, 42 mmol) at ambient temperature under nitrogen atmosphere. The reaction mixture was stirred for 2 h at ambient temperature and then evaporated. Precipitate was washed with IPE, dried under reduced pressure to afford methyl (S)-2-(1-amino-3-(methylthio)propyl)-1H-benzo[d]imidazole-5-carboxylate hydrochloride (1.38 g, quant.) as a powder. LC–MS (ESI)  $m/z$ : 280 ( $\text{M} + \text{H}^+$ ).  $^1\text{H}$  NMR (500 MHz,  $\text{CDCl}_3\text{--CD}_3\text{OD}$ ): 2.05 (3H, s), 2.55–2.65 (2H, m), 2.70–2.85 (2H, m), 3.99 (3H, s), 5.45 (1H, m), 7.88 (1H, d,  $J = 8.8$  Hz), 8.24 (1H, d,  $J = 8.8$  Hz), 8.50 (1H, s).

c) To a solution of the above compound (139 mg, 0.54 mmol), 3,6,6-trimethyl-4-oxo-4,5,6,7-tetrahydro-1H-indole-2-carboxylic acid (50 mg, 0.23 mmol) and HOBT (36.5 mg, 0.27 mmol) in DMF (5 mL) were added DIEA (0.047 mL, 0.27 mmol) and EDCI-HCl (36.5 mg, 0.27 mmol) at  $0^\circ\text{C}$  under nitrogen atmosphere. The reaction mixture was stirred overnight at ambient temperature before being quenched with water. The aqueous layer was separated and extracted with ethyl acetate. Combined organic layer was washed with water and brine, dried over anhydrous sodium sulfate, and concentrated under reduced pressure after filtration. The residue was purified by flash column chromatography on silica gel (ethyl acetate–hexane) and triturated with IPE to afford compound **9** (30 mg, 27.6%) as a colorless powder. LC–MS (ESI)  $m/z$ : 483 ( $\text{M} + \text{H}^+$ ).  $^1\text{H}$  NMR (500 MHz,  $\text{CDCl}_3$ ):  $\delta$  [ppm] 1.09 (6H, s), 2.14 (3H, s), 2.10–2.22 (1H, m), 2.24–2.33 (1H, m), 2.34 (2H, s), 2.58–2.78 (2H, m), 2.64 (2H, s), 2.69 (3H, s), 4.92 (1H, q,  $J = 7.1$  Hz), 6.77 (1H, d,  $J = 7.7$  Hz), 7.12 (1H, t,  $J = 7.4$  Hz), 7.32 (2H, t,  $J = 7.6$  Hz), 7.53 (2H, d,  $J = 8.1$  Hz), 8.52 (1H, s), 9.39 (1H, brs).

Compounds **6** and **8** were synthesized following the same procedure of compound **9**.

**(S)-N-(1-(1H-benzo[d]imidazol-2-yl)-3-(methylthio)propyl)-3,6,6-trimethyl-4-oxo-4,5,6,7-tetrahydro-1H-indole-2-carboxamide (6)**. LC–MS (ESI) *m/z*: 425 (*M* + *H*<sup>+</sup>). HRMS *m/z*: (*M* + *H*<sup>+</sup>) observed for C<sub>14</sub>H<sub>24</sub>N<sub>2</sub>O<sub>2</sub> + *H*<sup>+</sup>: 253.19160; found, 253.19083. <sup>1</sup>H NMR (500 MHz, DMSO-*d*<sub>6</sub>): δ [ppm] 1.02 (s, 6H), 2.08 (s, 3H), 2.15–2.28 (m, 3H), 2.30–2.41 (m, 1H), 2.49 (s, 3H), 2.55–2.63 (m, 2H), 2.65 (s, 2H), 5.38–5.44 (m, 1H), 7.11–7.21 (m, 2H), 7.38–7.64 (m, 2H), 7.97 (d, *J* = 8.2 Hz, 1H), 11.60 (s, 1H), 12.33 (s, 1H).

**(S)-N-(1-(1H-benzo[d]imidazol-2-yl)-3-(methylthio)propyl)-4,5-dihydro-2H-benzo[*g*]indazole-3-carboxamide (8)**. LC–MS (ESI) *m/z*: 418 (*M* + *H*<sup>+</sup>). <sup>1</sup>H NMR (500 MHz, CDCl<sub>3</sub>): δ [ppm] 1.98 (3H, s), 2.40–2.72 (4H, m), 2.87–3.10 (3H, m), 3.16–3.28 (1H, m), 5.78–5.93 (1H, m), 7.15–7.32 (6H, m), 7.34–7.47 (1H, m), 7.69–7.92 (2H, m), 10.00 (1H, s), 11.05 (1H, s).

**(S)-3,6,6-trimethyl-N-(4-(methylthio)-1-oxo-1-(phenylamino)butan-2-yl)-4-oxo-4,5,6,7-tetrahydro-1H-indole-2-carboxamide (10)**.

The above-mentioned compound was obtained following the same procedure b and c as a colorless powder.

LC–MS (ESI) *m/z*: 428 (*M* + *H*<sup>+</sup>). <sup>1</sup>H NMR (500 MHz, CDCl<sub>3</sub>): δ [ppm] 1.06 (6H, d, *J* = 13.0 Hz), 2.05 (3H, s), 2.32 (2H, s), 2.40–2.50 (1H, m), 2.53–2.75 (3H, m), 2.58 (2H, s), 2.65 (3H, s), 3.93 (3H, s), 5.54–5.63 (1H, m), 6.95–7.13 (1H, m), 7.34–7.76 (1H, m), 7.95 (1H, d, *J* = 8.8 Hz), 8.08–8.47 (1H, m), 9.70 (1H, s), 11.11 (1H, s).

### Compound synthesis in Supplementary Fig. 16.

The synthesis of **11** (RK-701) and *R*-**11** (RK-0133114) is outlined in Supplementary Fig. 16. Commencing with commercially available **1**, an alkylation reaction with **2** afforded compound **3**, and the *N*-protected amino acid ester *rac*-**5** was synthesized in a two-step procedure via hydrolysis under basic conditions and decarboxylation reaction. *rac*-**8** was obtained by removal of the Boc group followed by condensation with carboxylic acid **7** under standard conditions. The ester moiety of *rac*-**8** was hydrolyzed under basic conditions, and condensation of the resultant carboxylic acid *rac*-**9** with 4-cyanoaniline (**10**) resulted in *rac*-**11**. Furthermore, the synthesis of the desired **11** (RK-701) and *R*-**11** (RK-0133114) was accomplished by optical resolution of *rac*-**11** using chiral column chromatography.

**diethyl 2-((*tert*-butoxycarbonyl)amino)-2-(2-cyclopropylethyl)malonate (3)**. To a solution of **2** (0.796 mL, 3.12 mmol) in DMF (5.20 mL) was added potassium *tert*-butoxide (327 mg, 2.91 mmol) at ambient temperature under an argon atmosphere. The reaction mixture was stirred for 30 min at 70° C before being cooled to ambient temperature. The resultant reaction mixture was added a solution of **1** (500 mg, 2.08 mmol) in DMF (5.20 mL) at ambient temperature under an argon atmosphere. The reaction mixture was stirred for 5 h at 70° C before being quenched with water. The organic materials were extracted with ethyl acetate and washed with water and brine. The organic phase was dried over anhydrous sodium sulfate and concentrated under reduced pressure after filtration. The residue was purified by flash column chromatography on silica gel (ethyl acetate/hexane = 10/90) to afford **3** (450 mg, 1.31 mmol, 63%) as a colorless oil. LC–MS (FI): *m/z* 343 [*M*]<sup>+</sup>. HRMS calculated for C<sub>17</sub>H<sub>29</sub>NO<sub>6</sub> [*M*]<sup>+</sup>: 343.19949; found, 343.19898. <sup>1</sup>H NMR (400 MHz, CDCl<sub>3</sub>) δ –0.05–0.00 (m, 2H), 0.38–0.44 (m, 2H), 0.60–0.71 (m, 1H), 1.03–1.10 (m, 2H), 1.20–1.30 (m, 6H), 1.43 (s, 9H), 2.36–2.44 (m, 2H), 4.15–4.35 (m, 4H), 5.89 (br s, 1H).

**2-((*tert*-butoxycarbonyl)amino)-4-cyclopropyl-2-(ethoxycarbonyl)butanoic acid (*rac*-4)**. To a solution of **3** (450 mg, 1.31 mmol) in EtOH (6.55 mL) was added an aqueous solution of potassium hydroxide (0.720 mL, 1.44 mmol, 2 mol/L) at ambient temperature under an argon atmosphere. The reaction mixture was stirred for 5 h at the same temperature before being concentrated under reduced pressure. The residue was acidified to pH 2 by the addition of 1 mol/L hydrochloric acid. The organic materials were extracted with ethyl acetate and washed with brine. The organic phase was dried over anhydrous sodium sulfate and concentrated under reduced pressure after filtration to afford *rac*-**4** (381 mg, 1.21 mmol, 92%) as a colorless oil. LC–MS (ESI–): *m/z* 314 [*M* – *H*]<sup>+</sup>. HRMS calculated for C<sub>15</sub>H<sub>24</sub>NO<sub>6</sub> [*M* – *H*]<sup>+</sup>: 314.16036; found, 314.15966. <sup>1</sup>H NMR (400 MHz, CDCl<sub>3</sub>) δ –0.01–0.03 (m, 2H), 0.40–0.45 (m, 2H), 0.61–0.70 (m, 1H), 1.08–1.20 (m, 2H), 1.30 (t, *J* = 7.3 Hz, 3H), 1.43 (s, 9H), 2.30–2.36 (m, 2H), 4.20–4.35 (m, 2H), 5.75 (br s, 1H).

**ethyl 2-((*tert*-butoxycarbonyl)amino)-4-cyclopropylbutanoate (*rac*-5)**. A solution of *rac*-**4** (381 mg, 1.21 mmol) in 1,2-dichlorobenzene (2.42 mL) was stirred for 2 h at 110° C under an argon atmosphere before being cooled to ambient temperature. The resultant reaction mixture was purified by flash column chromatography on silica gel (hexane to ethyl acetate/hexane = 20/80) to afford *rac*-**5** (281 mg, 1.04 mmol, 86%) as a colorless oil. LC–MS (ESI+): *m/z* 272 [*M* + *H*]<sup>+</sup>. HRMS calculated for C<sub>14</sub>H<sub>26</sub>NO<sub>4</sub> [*M* + *H*]<sup>+</sup>: 272.18618; found, 272.18690. <sup>1</sup>H NMR (400 MHz, CDCl<sub>3</sub>) δ –0.02–0.04 (m, 2H), 0.40–0.45 (m, 2H), 0.61–0.72 (m, 1H), 1.20–1.30 (m, 5H), 1.44 (s, 9H), 1.67–1.77 (m, 1H), 1.86–1.96 (m, 1H), 4.16–4.23 (m, 2H), 4.26–4.33 (m, 1H), 4.98 (d, *J* = 7.3 Hz, 1H).

ethyl 4-cyclopropyl-2-(3,6,6-trimethyl-4-oxo-4,5,6,7-tetrahydro-1H-indole-2-carboxamido)butanoate (*rac-8*). To a solution of *rac-5* (1.07 g, 3.94 mmol) in CH<sub>2</sub>Cl<sub>2</sub> (9.86 mL) was added trifluoroacetic acid (9.86 mL) at ambient temperature under an argon atmosphere. The reaction mixture was stirred for 30 min at the same temperature before being concentrated under reduced pressure. To a solution of crude materials (*rac-6*) in DMF (19.7 mL) were added **7** (872 mg, 3.94 mmol), HOBT-H<sub>2</sub>O (724 mg, 4.73 mmol), DIEA (2.69 mL, 15.8 mmol) and EDCI-HCl (832 mg, 4.34 mmol) at ambient temperature under an argon atmosphere. The reaction mixture was stirred for 17 h at the same temperature before being quenched with water. The organic materials were extracted with ethyl acetate and washed with brine. The organic phase was dried over anhydrous sodium sulfate and concentrated under reduced pressure after filtration. The residue was purified by flash column chromatography on silica gel (ethyl acetate/hexane = 50/50) to afford *rac-8* (1.29 g, 3.43 mmol, 87%) as a pale yellow powder. LC-MS (FD): *m/z* 374 [M]<sup>+</sup>. HRMS calculated for C<sub>21</sub>H<sub>30</sub>N<sub>2</sub>O<sub>4</sub> [M]<sup>+</sup>: 374.22056; found, 374.22088. <sup>1</sup>H NMR (400 MHz, CDCl<sub>3</sub>) δ 0.00–0.04 (m, 2H), 0.41–0.46 (m, 2H), 0.63–0.73 (m, 1H), 1.10 (s, 6H), 1.20–1.28 (m, 1H), 1.31 (t, *J* = 7.3 Hz, 3H), 1.32–1.38 (m, 1H), 1.84–1.95 (m, 1H), 2.02–2.13 (m, 1H), 2.34 (s, 2H), 2.64 (s, 2H), 2.67 (s, 3H), 4.20–4.28 (m, 2H), 4.79 (td, *J* = 7.3, 5.4 Hz, 1H), 6.38 (d, *J* = 7.3 Hz, 1H), 9.40 (br s, 1H).

4-cyclopropyl-2-(3,6,6-trimethyl-4-oxo-4,5,6,7-tetrahydro-1H-indole-2-carboxamido)butanoic acid (*rac-9*). To a solution of *rac-8* (1.29 g, 3.44 mmol) in EtOH/THF/H<sub>2</sub>O (34.5 mL, 1/1/1) was added lithium hydroxide monohydrate (217 mg, 5.17 mmol) at 0° C under an argon atmosphere. The reaction mixture was stirred for 6 h at ambient temperature before being concentrated under reduced pressure. The residue was acidified to pH 2 by the addition of 1 mol/L hydrochloric acid. The resultant precipitate was filtered and rinsed with water to afford *rac-9* (1.17 g, 3.38 mmol, 98%) as a colorless powder. LC-MS (ESI+): *m/z* 347 [M + H]<sup>+</sup>. HRMS calculated for C<sub>19</sub>H<sub>27</sub>N<sub>2</sub>O<sub>4</sub> [M + H]<sup>+</sup>: 347.19708; found, 347.19652. <sup>1</sup>H NMR (400 MHz, DMSO-*d*<sub>6</sub>) δ -0.05–0.00 (m, 2H), 0.32–0.37 (m, 2H), 0.59–0.69 (m, 1H), 1.01 (s, 6H), 1.13–1.31 (m, 2H), 1.69–1.80 (m, 1H), 1.81–1.91 (m, 1H), 2.20 (s, 2H), 2.46 (s, 3H), 2.63 (s, 2H), 4.24 (q, *J* = 7.3 Hz, 1H), 7.71 (br s, 1H).

*N*-(1-((4-cyanophenyl)amino)-4-cyclopropyl-1-oxobutan-2-yl)-3,6,6-trimethyl-4-oxo-4,5,6,7-tetrahydro-1H-indole-2-carboxamide (*rac-11*). To a solution of *rac-9* (50.0 mg, 0.144 mmol) in DMF (0.722 mL) were added **10** (17.0 mg, 0.144 mmol) and DMT-MM nH<sub>2</sub>O (47.9 mg, 0.173 mmol) at ambient temperature under an argon atmosphere. The reaction mixture was stirred for 7 h at the same temperature before being quenched with water. The organic materials were extracted with ethyl acetate and washed with brine. The organic phase was dried over anhydrous sodium sulfate and concentrated under reduced pressure after filtration. The residue was purified by flash column chromatography on silica gel (ethyl acetate/hexane = 50/50) and triturated with IPE to afford *rac-11* (11.9 mg, 0.0266 mmol, 19%) as a colorless powder. Mp: 224–225° C. IR (ATR)  $\nu_{\max}$ : 3264, 2225, 1596, 1510, 1310, 1177, 1068, 839, 548 cm<sup>-1</sup>. LC-MS (ESI+): *m/z* 447 [M + H]<sup>+</sup>. Retention time: 4.81 min. LC purity: >99%. HRMS calculated for C<sub>26</sub>H<sub>31</sub>N<sub>4</sub>O<sub>3</sub> [M + H]<sup>+</sup>: 447.23961; found, 447.24011. <sup>1</sup>H NMR (400 MHz, DMSO-*d*<sub>6</sub>) δ 0.01–0.05 (m, 2H), 0.37–0.42 (m, 2H), 0.68–0.75 (m, 1H), 1.02 (s, 6H), 1.22–1.36 (m, 2H), 1.79–1.93 (m, 2H), 2.22 (s, 2H), 2.46 (s, 3H), 2.64 (s, 2H), 4.57 (td, *J* = 7.9, 5.5 Hz, 1H), 7.71 (d, *J* = 7.9 Hz, 1H), 7.78 (d, *J* = 9.2 Hz, 2H), 7.81 (d, *J* = 9.2 Hz, 2H), 10.58 (s, 1H), 11.65 (s, 1H).

(*S*)-*N*-(1-((4-cyanophenyl)amino)-4-cyclopropyl-1-oxobutan-2-yl)-3,6,6-trimethyl-4-oxo-4,5,6,7-tetrahydro-1H-indole-2-carboxamide (**11**). The title compound was separated from *rac-11* (15.0 mg) with CHIRALPAK IA column (EtOH/hexane = 50/50, 1.0 mL/min, 25° C) as a colorless powder (6.20 mg, 41.3%). Enantiomeric excess was determined by the same column conditions, minor enantiomer *t*<sub>R</sub> = 5.78 min (0.3%), major enantiomer *t*<sub>R</sub> = 7.45 min (99.7%): 99.4% *ee*.

(*R*)-*N*-(1-((4-cyanophenyl)amino)-4-cyclopropyl-1-oxobutan-2-yl)-3,6,6-trimethyl-4-oxo-4,5,6,7-tetrahydro-1H-indole-2-carboxamide (**R-11**). The title compound was separated from *rac-11* (15.0 mg) with CHIRALPAK IA column (EtOH/hexane = 50/50, 1.0 mL/min, 25° C) as a colorless powder (5.64 mg, 37.6%). Enantiomeric excess was determined by the same column conditions, major enantiomer *t*<sub>R</sub> = 5.76 min (100%), minor enantiomer *t*<sub>R</sub> = 7.45 min (Not detected): 100% *ee*.

Abbreviations. DIEA, *N,N*-diisopropylethylamine; DMF, *N,N*-dimethylformamide; DMT-MM, 4-(4,6-dimethoxy-1,3,5-triazin-2-yl)-4-methylmorpholinium chloride; EDCI, 1-ethyl-3-(3-dimethylaminopropyl) carbodiimide; HOBT, 1,2,3-benzotriazol-1-ol; IPE, isopropyl ether; THF, tetrahydrofuran.

## Chiral separation of R- and S-enantiomers by HPLC

Optical resolution of rac-11 by chiral column chromatography.

Column: CHIRALPACK IA (4.6 mm I.D. x 250 mm L)

Particle Size: 5  $\mu$ m

Eluent: EtOH / Hexane = 50/50 < v/v >

Flow Rate: 1.0 mL/min

Column oven temperature: 25 ° C

Detector: 254 nm (UV)

Injections: 20  $\mu$ L x 12, 30  $\mu$ L x 26 (10 mg/mL in EtOH / Hexane (50 / 50))

Fractions were collected.

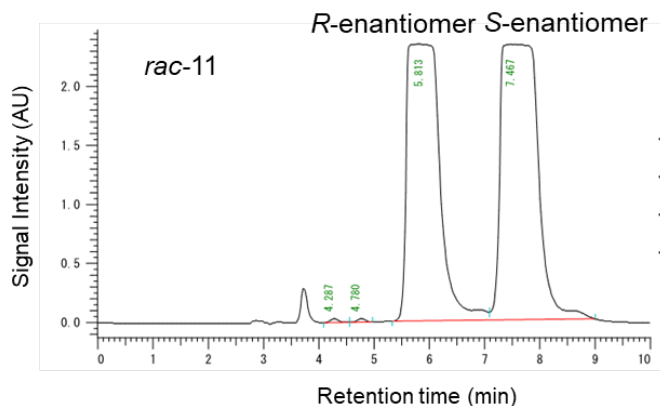

## HPLC charts of R-11 and 11.

HPLC analyses of 11 (RK-701) and R-11.

Column: CHIRALPACK IA (4.6 mm I.D. x 250 mm L)

Particle Size: 5  $\mu$ m

Eluent: EtOH / Hexane = 50/50 < v/v >

Flow Rate: 1.0 mL/min

Column oven temperature: 40 ° C

Detector: 254 nm (UV)

Injection: 10  $\mu$ L (10 mM in EtOH / Hexane (50 / 50))

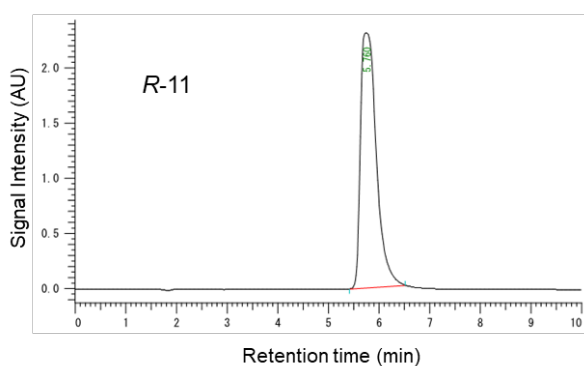

| # | Compound | Time (min) | Area    | Area % |
|---|----------|------------|---------|--------|
| 1 | R-11     | 5.76       | 2458640 | 100    |
| 2 | 11 (S)   | -          | -       | -      |

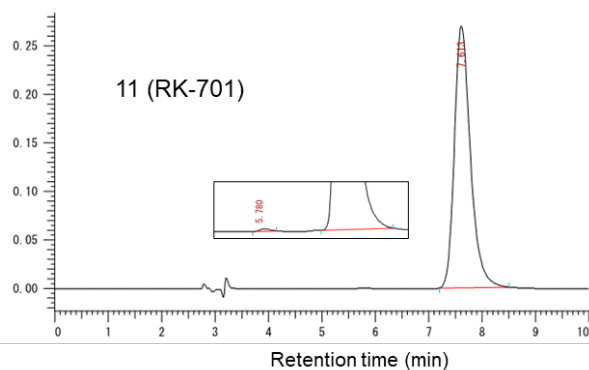

| # | Compound | Time (min) | Area     | Area % |
|---|----------|------------|----------|--------|
| 1 | R-11     | 5.78       | 138387   | 0.3    |
| 2 | 11 (S)   | 7.45       | 41201917 | 99.7   |



### LC-MS data of RK-701

The method was performed on an Agilent 1100 HPLC with diode array detector equipped with a RP-AQUA (2.1 mm × 50 mm ID, 2.6 μm). The method was as follows: ESI+, flux of 0.5 mL/min, 5–95% MeCN in H<sub>2</sub>O + 0.05% formic acid, total run time of 9 min (λ = 190–400 nm).

LC-MS (ESI+): m/z 447 [M + H]<sup>+</sup>. Retention time: 5.59 min. LC purity: 97%.

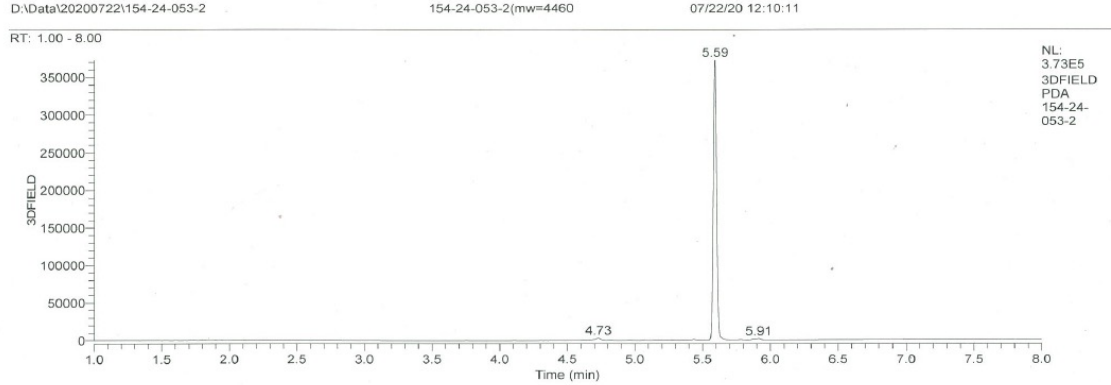

#### PEAK LIST

154-24-053-2.raw

RT: 0.00 - 9.00

Number of detected peaks: 7

| Apex RT | Start RT | End RT | Area      | %Area | Height    | %Height |
|---------|----------|--------|-----------|-------|-----------|---------|
| 4.73    | 4.66     | 4.79   | 8264.60   | 1.20  | 3206.20   | 0.84    |
| 5.19    | 5.16     | 5.23   | 706.30    | 0.10  | 420.00    | 0.11    |
| 5.43    | 5.40     | 5.49   | 2021.30   | 0.29  | 1096.21   | 0.29    |
| 5.59    | 5.54     | 5.74   | 670978.30 | 97.18 | 373343.43 | 97.63   |
| 5.78    | 5.74     | 5.83   | 1632.80   | 0.24  | 685.89    | 0.18    |
| 5.88    | 5.83     | 5.89   | 2622.00   | 0.38  | 1508.79   | 0.39    |
| 5.91    | 5.89     | 5.97   | 4201.10   | 0.61  | 2162.44   | 0.57    |

# Gating strategy FACS analysis in Supplementary Fig. 5h.

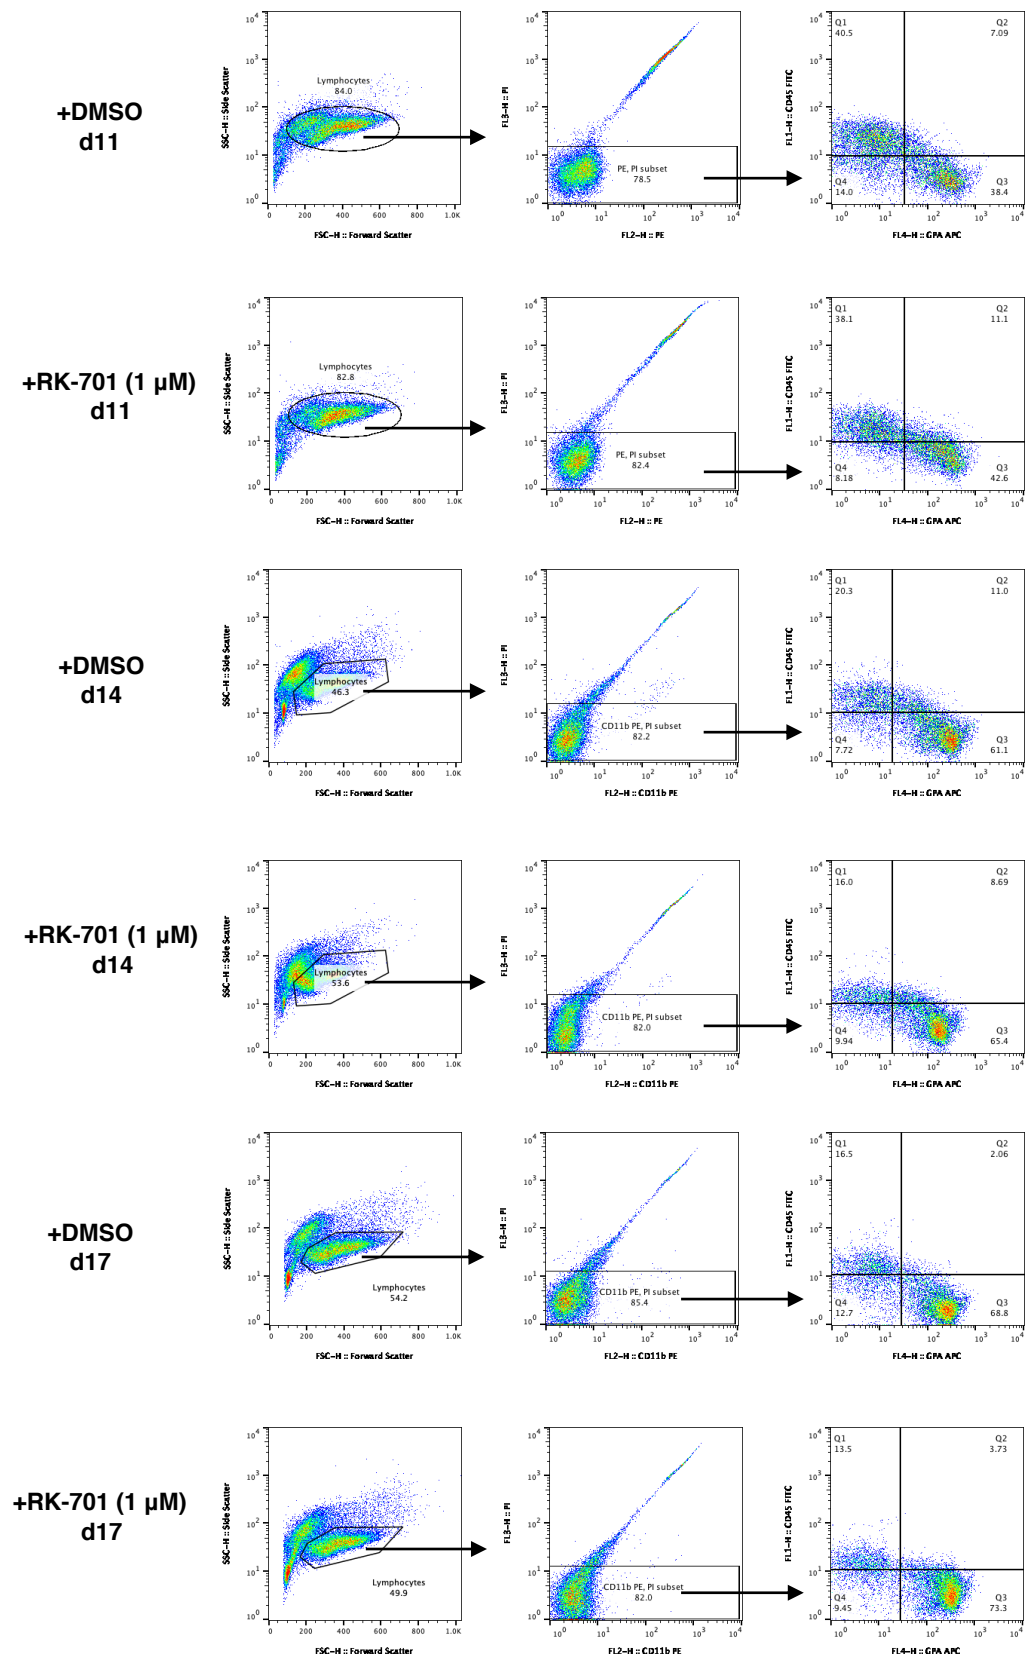

## Supplementary references

1. Young, M. D., Wakefield, M. J., Smyth, G. K. & Oshlack, A. Gene ontology analysis for RNA-seq: accounting for selection bias. *Genome Biology* **11**, R14 (2010).
2. Guo, G. et al. A long noncoding RNA critically regulates Bcr-Abl-mediated cellular transformation by acting as a competitive endogenous RNA. *Oncogene* **34**, 1768–1779 (2015).
3. Ivaldi, M. S. et al. Fetal  $\gamma$ -globin genes are regulated by the BGLT3 long noncoding RNA locus. *Blood* **132**, 1963–1973 (2018).
4. Orkin, S. H. & Bauer, D. E. Emerging Genetic Therapy for Sickle Cell Disease. *Annual Review of Medicine* **70**, 257–271 (2019).
5. Masuda, T. et al. Transcription factors LRF and BCL11A independently repress expression of fetal hemoglobin. *Science* **351**, 285–289 (2016).
6. Johnson, R. M. et al. Fetal globin expression in New World monkeys. *J Biol Chem* **271**, 14684–14691 (1996).
7. Tan, Y., Yoder, A. D., Yamashita, N. & Li, W.-H. Evidence from opsin genes rejects nocturnality in ancestral primates. *Proceedings of the National Academy of Sciences* **102**, 14712–14716 (2005).
8. Hardison, R. C. Evolution of hemoglobin and its genes. *Cold Spring Harb Perspect Med* **2**, a011627 (2012).
